# Supplementary material for: Exposure to PFAS chemicals induces sex-dependent alterations in key rate-limiting steps of lipid metabolism in liver steatosis
Source: Front Toxicol. 2024 Jun 5;6:1390196. doi: 10.3389/ftox.2024.1390196 (PMC11188372; doi:10.3389/ftox.2024.1390196)
Supplement: Supplementary file 3 [file DataSheet3.xlsx]

## Sheet: Contents
Sheet	Description
Expression	Significant expression (q < 0.1) of lipid accumulative genes in response to 2,3-Benzoflourene, 6:1 FTOH, 10:2 FTOH, and PFHxSAm
Counts	Number of genes with similar or opposite expression within each gene set
Counts_Summary	Summary of number of genes with similar or opposite expression in response to each toxicant and in male and female rats

## Sheet: Expression
Gene set	Gene Symbol	Expected/Weight	2-3BF-1000_female	6-1FTOH-1000	10-2FTOH-475	PFHxSAm-111_female	2-3BF-1000_male	6-1FTOH-333	10-2FTOH-475	PFHxSAm-111_male
Centrilobular	Ncoa5	-0.970821	0	0	0	0	0	0.1	-0.07	0.08
	Tmem50b	-0.846639	0.41	0.1	0.26	0.19	0.18	0.26	0.17	0
	Lifr	-0.814036	0	-0.77	0	-0.37	0.16	-0.41	0	-0.31
	Vkorc1l1	-0.771607	0.2	0.33	-0.1	0	0.12	0.11	0.07	0.07
	Dusp8	-0.738024	0	0	0	0	0	0	0	0
	Ric3	-0.63367	0	-0.09	0	0.16	-0.11	-0.09	0	0.13
	Dpt	-0.535551	0	-0.69	0.34	-0.57	0	-0.48	0	-0.53
	Orm1	-0.524358	0.63	2.61	1.48	1.84	0.66	0.98	1.5	0.67
	Rnf152	-0.514924	0	0.37	0	0.14	0	0.56	0.11	0
	Cryl1	-0.492145	1.44	0.54	1.65	0.35	0.98	0	2.24	0.44
	Palmd	-0.487194	0	-0.12	-0.35	0	0.16	0.21	-0.23	0.2
	Ehhadh	-0.480863	-0.48	4.81	1.14	1.98	-0.23	6.57	1.39	5.03
	Rtn4rl1	-0.480261	0	0.24	-0.34	-0.13	0	0.62	-0.36	0.35
	Gstp1	-0.442912	2.13	0	0	0	0	-0.21	0.94	0
	Tf	-0.42452	0.07	-0.8	0.29	0	0	-1.8	0.3	-0.88					Legend
	Tiparp	-0.410946	-0.26	0.24	0	0	0.38	0.56	0.47	0.45
	Ecel1	-0.361073	0	0	-0.13	0	0	-0.08	-0.12	0					0	FDR q > 0.1
	Arhgap21	-0.345178	0	-0.28	0	0	0	-0.18	0	-0.26						Downregulated
	Ptgr1	-0.312856	0.55	-0.31	0.48	0	0.35	-0.51	0.71	-0.31						Upregulated
	Ccdc113	-0.272368	0	-0.34	-0.21	0	0	-0.35	-0.22	-0.14
	Serpina5	-0.191764	0	0.1	0.16	0.18	0	0.16	0.11	0
	Mybl1	-0.157554	0	0	0	0	0	0	0	-0.4
	B3gnt2	-0.141287	0	0.36	0.29	0.2	0	-0.34	0.52	0.36
	Trim47	-0.0838691	0	-0.19	0.1	0	0	-0.12	0	-0.2
	Birc3	-0.0807312	-0.39	0	0	0	0	0.7	0.67	0
	Nol3	-0.0603739	0	0	0	0	0	0.84	0.81	0.26
	Entpd8	-0.0493954	-0.22	0.23	0.2	0	0	0.13	0	0.23
	Apc	-0.0381425	0	-0.05	-0.08	0	0	-0.1	-0.03	-0.04
	Camta1	0.0539659	0	0.17	0	0.18	0.12	0.25	-0.08	0.39
	Cry1	0.0649689	0	-0.32	-0.25	0	-0.46	-0.13	-0.48	-0.25
	Xcl1	0.0727499	0	-0.22	0	-0.37	0	-0.26	0	0
	Svil	0.0900293	0	0	0	0.09	0	-0.13	0	0
	Manba	0.0939695	0	-0.1	-0.17	0	0.22	-0.53	0	-0.37
	Oat	0.137749	-0.32	-0.11	-0.4	0	-0.55	-0.71	-1.23	-0.45
	Pak1	0.139374	0	0.67	0.59	0.41	0	0.42	0.8	0
	Ly49si1	0.1749	0	-0.94	0.82	0	0	-0.21	0.33	0
	Cyp26b1	0.248994	0	0.2	0	0	0	-0.49	2.07	0
	Etv1	0.264746	0	0	0	0	0	0.16	-0.34	0
	Col27a1	0.332614	-0.18	-0.32	-0.09	-0.12	-0.28	-0.52	-0.28	-0.15
	Lect2	0.3707	0	-0.55	-0.2	0	0	-0.62	-0.41	-0.6
	Emb	0.465594	0	-0.34	0.25	-0.15	0	-0.53	0.19	-0.46
	Tfap2c	0.513859	0	0	-0.28	0	0.16	0.26	-0.13	0.39
	Slc15a2	0.535083	0	-0.24	0	0.23	0	-0.38	0	0.15
	Gosr1	0.558077	0	0.17	-0.07	0.07	0.09	0.43	0.07	0.22
	Tenm2	0.637625	0	-0.21	-0.26	-0.08	0	-0.34	-0.24	0
	Bhlha15	0.898048	0	0	0	0.47	0.42	0	0	0.4
	Pfn2	1.10558	0	0	0	0	-0.32	0.33	0.29	0
	App	1.91589	0.23	0.25	0.3	0	0	0.51	0	0
Macrovesicular	Polr3g	-0.894101	0	0	0.44	0	0	0.21	0.91	0.27
	Dop1b	-0.64442	0	-0.08	0.05	0	0	-0.16	0	-0.14
	Ces1c	-0.424915	0.22	-0.11	0.11	0	0.19	-0.09	0.24	0
	Tcea3	-0.405477	-0.13	0	0.31	0	0.16	-0.09	0.28	0
	Lrp1	-0.398518	-0.29	0	0	0	0	0.18	-0.21	0.21
	Gstp1	-0.292586	2.13	0	0	0	0	-0.21	0.94	0
	Rprm	-0.0782085	-0.92	0.18	-0.4	0	-0.57	0.53	-0.79	0.52
	Adgrg2	-0.0777895	0	0.39	0	0.46	0.42	0.84	0.39	0.95
	Trim17	-0.0633295	0	-0.09	-0.17	-0.14	0	-0.24	-0.19	-0.26
	Fam13a	-0.0465227	0	-0.8	-0.17	-0.26	0	-0.78	0	-0.82
	Npas2	-0.0435401	-1.4	-0.54	-0.75	-0.35	-0.92	-0.69	-0.42	0.45
	Nrg1	-0.0284761	0.26	0.16	0.14	0.08	0.12	0.21	0.27	0.11
	Sult1a1	-0.0174985	0	-0.38	-0.27	0	0	-0.24	-0.15	-0.32
	Hspb1	0.0368721	0	0.47	0.41	0.89	-0.56	1.6	0.7	0.76
	Rbp7	0.0537716	0	0.31	0.36	0	0	-0.11	0	-0.55
	Meox2	0.0824183	-0.38	0.76	0.4	0.46	0	0.53	0.44	1.09
	Serpina6	0.100016	-1.01	0.25	0	-0.9	-0.86	0.39	-0.67	0
	Tmem86a	0.110288	-0.19	-0.71	0	-0.33	0	-0.81	0	-0.61
	Cxcr4	0.148704	0	0	0	0	0	0	0.12	0
	Gas6	0.363473	-0.19	-0.62	0	-0.27	0.16	-0.73	-0.16	-0.5
	Pfn2	0.548197	0	0	0	0	-0.32	0.33	0.29	0
	Lect2	0.940985	0	-0.55	-0.2	0	0	-0.62	-0.41	-0.6
	Rab3d	1.01943	0.29	0.16	0.14	0.17	0	-0.1	0.15	0
	App	1.71576	0.23	0.25	0.3	0	0	0.51	0	0
Periportal	Cdkn2b	-0.411898	0	0.05	0.1	0	0	0.03	0.07	0
	Neu2	-0.33872	0	-0.18	-0.19	0	0	0.12	0	0
	Tf	-0.309182	0.07	-0.8	0.29	0	0	-1.8	0.3	-0.88
	Gnmt	-0.210163	-0.28	-0.31	0	0	-0.28	-0.14	-0.21	0
	Hmgcr	-0.123086	0.84	0	0.51	0	0	-0.38	0.97	-0.93
	Gck	-0.109089	0	0	-0.4	0.54	0	0.28	0	-0.92
	Adh5	-0.102448	0.24	1.07	0.68	0.5	0.27	1.95	1.27	0.87
	Ppp1r3c	-0.0677232	0.35	-0.96	0	0	0	-1.08	-0.36	-0.95
	Hamp	-0.0212819	0	-1.08	0	0	0	-1.37	0	-1.4
	Insig1	-0.0154003	0.63	1.89	0	0	0	0	-0.9	0
	Hdc	0.0599731	0	5.17	0.56	1.54	0	6.68	1.17	4.13
	Snx10	0.0764565	0.63	1.42	0.58	0.63	0.55	1.96	1.35	1.24
	Abcg5	0.114627	-0.83	-2.47	-0.89	-1.34	-1.11	-2.97	-0.38	-2.07
	Rab3d	0.125064	0.29	0.16	0.14	0.17	0	-0.1	0.15	0
	Ggt1	0.154803	0.32	0.28	0.38	0.23	0.27	0	0.58	0.12
	Pfn2	0.27036	0	0	0	0	-0.32	0.33	0.29	0
	Nipal1	0.282183	-0.54	-0.22	-0.15	-0.16	0	-0.22	-0.17	0
	Nrep	0.342621	-1.2	-1.6	-1.01	-1.15	-0.56	-1.77	-1.59	0
	Ctsw	0.364709	0	-0.16	0	0	0.11	-0.26	0	0
	Tmem139	0.440682	0	-0.34	-0.1	0	0	-0.35	-0.13	-0.09
	Tekt5	0.469074	0	-0.17	-0.1	-0.13	0	-0.19	-0.08	-0.13
	Nol3	0.606713	0	0	0	0	0	0.84	0.81	0.26
	Fcrla	0.608543	-0.16	0	0	-0.11	0	-0.24	-0.09	0
	Fam210b	0.684749	0	-0.28	-0.19	0	0	-0.52	-0.37	0
	Per3	0.872708	0.2	0.35	0	0.16	0.14	0.14	-0.07	0

## Sheet: Counts
Expression														Genes with similar direction of up- or downregulation													Genes with similar direction of regulation and FC ≥ 0.6 or FC ≤ -0.6													Genes with opposite direction of up- or downregulation
Gene set	Gene Symbol	Weight	2-3BF-1000_female	6-1FTOH-1000	10-2FTOH-475	PFHxSAm-111_female	2-3BF-1000_male	6-1FTOH-333	10-2FTOH-475	PFHxSAm-111_male		0		Gene set	Gene Symbol	2-3BF-1000_female	6-1FTOH-1000	10-2FTOH-475	PFHxSAm-111_female	2-3BF-1000_male	6-1FTOH-333	10-2FTOH-475	PFHxSAm-111_male				Gene set	Gene Symbol	2-3BF-1000_female	6-1FTOH-1000	10-2FTOH-475	PFHxSAm-111_female	2-3BF-1000_male	6-1FTOH-333	10-2FTOH-475	PFHxSAm-111_male				Gene set	Gene Symbol	2-3BF-1000_female	6-1FTOH-1000	10-2FTOH-475	PFHxSAm-111_female	2-3BF-1000_male	6-1FTOH-333	10-2FTOH-475	PFHxSAm-111_male
Centrilobular	Ncoa5	-0.970821	0	0	0	0	0	0.1	-0.07	0.08		-0.6		Centrilobular	Ncoa5	0	0	0	0	0	0	1	0				Centrilobular	Ncoa5	0	0	0	0	0	0	0	0				Centrilobular	Ncoa5	0	0	0	0	0	1	0	1
Centrilobular	Tmem50b	-0.846639	0.41	0.1	0.26	0.19	0.18	0.26	0.17	0		0.6		Centrilobular	Tmem50b	0	0	0	0	0	0	0	0				Centrilobular	Tmem50b	0	0	0	0	0	0	0	0				Centrilobular	Tmem50b	1	1	1	1	1	1	1	0
Centrilobular	Lifr	-0.814036	0	-0.77	0	-0.37	0.16	-0.41	0	-0.31				Centrilobular	Lifr	0	1	0	1	0	1	0	1				Centrilobular	Lifr	0	1	0	0	0	0	0	0				Centrilobular	Lifr	0	0	0	0	1	0	0	0
Centrilobular	Vkorc1l1	-0.771607	0.2	0.33	-0.1	0	0.12	0.11	0.07	0.07				Centrilobular	Vkorc1l1	0	0	1	0	0	0	0	0				Centrilobular	Vkorc1l1	0	0	0	0	0	0	0	0				Centrilobular	Vkorc1l1	1	1	0	0	1	1	1	1
Centrilobular	Dusp8	-0.738024	0	0	0	0	0	0	0	0				Centrilobular	Dusp8	0	0	0	0	0	0	0	0				Centrilobular	Dusp8	0	0	0	0	0	0	0	0				Centrilobular	Dusp8	0	0	0	0	0	0	0	0
Centrilobular	Ric3	-0.63367	0	-0.09	0	0.16	-0.11	-0.09	0	0.13				Centrilobular	Ric3	0	1	0	0	1	1	0	0				Centrilobular	Ric3	0	0	0	0	0	0	0	0				Centrilobular	Ric3	0	0	0	1	0	0	0	1
Centrilobular	Dpt	-0.535551	0	-0.69	0.34	-0.57	0	-0.48	0	-0.53				Centrilobular	Dpt	0	1	0	1	0	1	0	1				Centrilobular	Dpt	0	1	0	0	0	0	0	0				Centrilobular	Dpt	0	0	1	0	0	0	0	0
Centrilobular	Orm1	-0.524358	0.63	2.61	1.48	1.84	0.66	0.98	1.5	0.67				Centrilobular	Orm1	0	0	0	0	0	0	0	0				Centrilobular	Orm1	0	0	0	0	0	0	0	0				Centrilobular	Orm1	1	1	1	1	1	1	1	1
Centrilobular	Rnf152	-0.514924	0	0.37	0	0.14	0	0.56	0.11	0				Centrilobular	Rnf152	0	0	0	0	0	0	0	0				Centrilobular	Rnf152	0	0	0	0	0	0	0	0				Centrilobular	Rnf152	0	1	0	1	0	1	1	0
Centrilobular	Cryl1	-0.492145	1.44	0.54	1.65	0.35	0.98	0	2.24	0.44				Centrilobular	Cryl1	0	0	0	0	0	0	0	0				Centrilobular	Cryl1	0	0	0	0	0	0	0	0				Centrilobular	Cryl1	1	1	1	1	1	0	1	1
Centrilobular	Palmd	-0.487194	0	-0.12	-0.35	0	0.16	0.21	-0.23	0.2				Centrilobular	Palmd	0	1	1	0	0	0	1	0				Centrilobular	Palmd	0	0	0	0	0	0	0	0				Centrilobular	Palmd	0	0	0	0	1	1	0	1
Centrilobular	Ehhadh	-0.480863	-0.48	4.81	1.14	1.98	-0.23	6.57	1.39	5.03				Centrilobular	Ehhadh	1	0	0	0	1	0	0	0				Centrilobular	Ehhadh	0	0	0	0	0	0	0	0				Centrilobular	Ehhadh	0	1	1	1	0	1	1	1
Centrilobular	Rtn4rl1	-0.480261	0	0.24	-0.34	-0.13	0	0.62	-0.36	0.35				Centrilobular	Rtn4rl1	0	0	1	1	0	0	1	0				Centrilobular	Rtn4rl1	0	0	0	0	0	0	0	0				Centrilobular	Rtn4rl1	0	1	0	0	0	1	0	1
Centrilobular	Gstp1	-0.442912	2.13	0	0	0	0	-0.21	0.94	0				Centrilobular	Gstp1	0	0	0	0	0	1	0	0				Centrilobular	Gstp1	0	0	0	0	0	0	0	0				Centrilobular	Gstp1	1	0	0	0	0	0	1	0
Centrilobular	Tf	-0.42452	0.07	-0.8	0.29	0	0	-1.8	0.3	-0.88				Centrilobular	Tf	0	1	0	0	0	1	0	1				Centrilobular	Tf	0	1	0	0	0	1	0	1				Centrilobular	Tf	1	0	1	0	0	0	1	0
Centrilobular	Tiparp	-0.410946	-0.26	0.24	0	0	0.38	0.56	0.47	0.45				Centrilobular	Tiparp	1	0	0	0	0	0	0	0				Centrilobular	Tiparp	0	0	0	0	0	0	0	0				Centrilobular	Tiparp	0	1	0	0	1	1	1	1
Centrilobular	Ecel1	-0.361073	0	0	-0.13	0	0	-0.08	-0.12	0				Centrilobular	Ecel1	0	0	1	0	0	1	1	0				Centrilobular	Ecel1	0	0	0	0	0	0	0	0				Centrilobular	Ecel1	0	0	0	0	0	0	0	0
Centrilobular	Arhgap21	-0.345178	0	-0.28	0	0	0	-0.18	0	-0.26				Centrilobular	Arhgap21	0	1	0	0	0	1	0	1				Centrilobular	Arhgap21	0	0	0	0	0	0	0	0				Centrilobular	Arhgap21	0	0	0	0	0	0	0	0
Centrilobular	Ptgr1	-0.312856	0.55	-0.31	0.48	0	0.35	-0.51	0.71	-0.31				Centrilobular	Ptgr1	0	1	0	0	0	1	0	1				Centrilobular	Ptgr1	0	0	0	0	0	0	0	0				Centrilobular	Ptgr1	1	0	1	0	1	0	1	0
Centrilobular	Ccdc113	-0.272368	0	-0.34	-0.21	0	0	-0.35	-0.22	-0.14				Centrilobular	Ccdc113	0	1	1	0	0	1	1	1				Centrilobular	Ccdc113	0	0	0	0	0	0	0	0				Centrilobular	Ccdc113	0	0	0	0	0	0	0	0
Centrilobular	Serpina5	-0.191764	0	0.1	0.16	0.18	0	0.16	0.11	0				Centrilobular	Serpina5	0	0	0	0	0	0	0	0				Centrilobular	Serpina5	0	0	0	0	0	0	0	0				Centrilobular	Serpina5	0	1	1	1	0	1	1	0
Centrilobular	Mybl1	-0.157554	0	0	0	0	0	0	0	-0.4				Centrilobular	Mybl1	0	0	0	0	0	0	0	1				Centrilobular	Mybl1	0	0	0	0	0	0	0	0				Centrilobular	Mybl1	0	0	0	0	0	0	0	0
Centrilobular	B3gnt2	-0.141287	0	0.36	0.29	0.2	0	-0.34	0.52	0.36				Centrilobular	B3gnt2	0	0	0	0	0	1	0	0				Centrilobular	B3gnt2	0	0	0	0	0	0	0	0				Centrilobular	B3gnt2	0	1	1	1	0	0	1	1
Centrilobular	Trim47	-0.0838691	0	-0.19	0.1	0	0	-0.12	0	-0.2				Centrilobular	Trim47	0	1	0	0	0	1	0	1				Centrilobular	Trim47	0	0	0	0	0	0	0	0				Centrilobular	Trim47	0	0	1	0	0	0	0	0
Centrilobular	Birc3	-0.0807312	-0.39	0	0	0	0	0.7	0.67	0				Centrilobular	Birc3	1	0	0	0	0	0	0	0				Centrilobular	Birc3	0	0	0	0	0	0	0	0				Centrilobular	Birc3	0	0	0	0	0	1	1	0
Centrilobular	Nol3	-0.0603739	0	0	0	0	0	0.84	0.81	0.26				Centrilobular	Nol3	0	0	0	0	0	0	0	0				Centrilobular	Nol3	0	0	0	0	0	0	0	0				Centrilobular	Nol3	0	0	0	0	0	1	1	1
Centrilobular	Entpd8	-0.0493954	-0.22	0.23	0.2	0	0	0.13	0	0.23				Centrilobular	Entpd8	1	0	0	0	0	0	0	0				Centrilobular	Entpd8	0	0	0	0	0	0	0	0				Centrilobular	Entpd8	0	1	1	0	0	1	0	1
Centrilobular	Apc	-0.0381425	0	-0.05	-0.08	0	0	-0.1	-0.03	-0.04				Centrilobular	Apc	0	1	1	0	0	1	1	1				Centrilobular	Apc	0	0	0	0	0	0	0	0				Centrilobular	Apc	0	0	0	0	0	0	0	0
Centrilobular	Camta1	0.0539659	0	0.17	0	0.18	0.12	0.25	-0.08	0.39				Centrilobular	Camta1	0	1	0	1	1	1	0	1				Centrilobular	Camta1	0	0	0	0	0	0	0	0				Centrilobular	Camta1	0	0	0	0	0	0	1	0
Centrilobular	Cry1	0.0649689	0	-0.32	-0.25	0	-0.46	-0.13	-0.48	-0.25				Centrilobular	Cry1	0	0	0	0	0	0	0	0				Centrilobular	Cry1	0	0	0	0	0	0	0	0				Centrilobular	Cry1	0	1	1	0	1	1	1	1
Centrilobular	Xcl1	0.0727499	0	-0.22	0	-0.37	0	-0.26	0	0				Centrilobular	Xcl1	0	0	0	0	0	0	0	0				Centrilobular	Xcl1	0	0	0	0	0	0	0	0				Centrilobular	Xcl1	0	1	0	1	0	1	0	0
Centrilobular	Svil	0.0900293	0	0	0	0.09	0	-0.13	0	0				Centrilobular	Svil	0	0	0	1	0	0	0	0				Centrilobular	Svil	0	0	0	0	0	0	0	0				Centrilobular	Svil	0	0	0	0	0	1	0	0
Centrilobular	Manba	0.0939695	0	-0.1	-0.17	0	0.22	-0.53	0	-0.37				Centrilobular	Manba	0	0	0	0	1	0	0	0				Centrilobular	Manba	0	0	0	0	0	0	0	0				Centrilobular	Manba	0	1	1	0	0	1	0	1
Centrilobular	Oat	0.137749	-0.32	-0.11	-0.4	0	-0.55	-0.71	-1.23	-0.45				Centrilobular	Oat	0	0	0	0	0	0	0	0				Centrilobular	Oat	0	0	0	0	0	0	0	0				Centrilobular	Oat	1	1	1	0	1	1	1	1
Centrilobular	Pak1	0.139374	0	0.67	0.59	0.41	0	0.42	0.8	0				Centrilobular	Pak1	0	1	1	1	0	1	1	0				Centrilobular	Pak1	0	1	0	0	0	0	1	0				Centrilobular	Pak1	0	0	0	0	0	0	0	0
Centrilobular	Ly49si1	0.1749	0	-0.94	0.82	0	0	-0.21	0.33	0				Centrilobular	Ly49si1	0	0	1	0	0	0	1	0				Centrilobular	Ly49si1	0	0	1	0	0	0	0	0				Centrilobular	Ly49si1	0	1	0	0	0	1	0	0
Centrilobular	Cyp26b1	0.248994	0	0.2	0	0	0	-0.49	2.07	0				Centrilobular	Cyp26b1	0	1	0	0	0	0	1	0				Centrilobular	Cyp26b1	0	0	0	0	0	0	1	0				Centrilobular	Cyp26b1	0	0	0	0	0	1	0	0
Centrilobular	Etv1	0.264746	0	0	0	0	0	0.16	-0.34	0				Centrilobular	Etv1	0	0	0	0	0	1	0	0				Centrilobular	Etv1	0	0	0	0	0	0	0	0				Centrilobular	Etv1	0	0	0	0	0	0	1	0
Centrilobular	Col27a1	0.332614	-0.18	-0.32	-0.09	-0.12	-0.28	-0.52	-0.28	-0.15				Centrilobular	Col27a1	0	0	0	0	0	0	0	0				Centrilobular	Col27a1	0	0	0	0	0	0	0	0				Centrilobular	Col27a1	1	1	1	1	1	1	1	1
Centrilobular	Lect2	0.3707	0	-0.55	-0.2	0	0	-0.62	-0.41	-0.6				Centrilobular	Lect2	0	0	0	0	0	0	0	0				Centrilobular	Lect2	0	0	0	0	0	0	0	0				Centrilobular	Lect2	0	1	1	0	0	1	1	1
Centrilobular	Emb	0.465594	0	-0.34	0.25	-0.15	0	-0.53	0.19	-0.46				Centrilobular	Emb	0	0	1	0	0	0	1	0				Centrilobular	Emb	0	0	0	0	0	0	0	0				Centrilobular	Emb	0	1	0	1	0	1	0	1
Centrilobular	Tfap2c	0.513859	0	0	-0.28	0	0.16	0.26	-0.13	0.39				Centrilobular	Tfap2c	0	0	0	0	1	1	0	1				Centrilobular	Tfap2c	0	0	0	0	0	0	0	0				Centrilobular	Tfap2c	0	0	1	0	0	0	1	0
Centrilobular	Slc15a2	0.535083	0	-0.24	0	0.23	0	-0.38	0	0.15				Centrilobular	Slc15a2	0	0	0	1	0	0	0	1				Centrilobular	Slc15a2	0	0	0	0	0	0	0	0				Centrilobular	Slc15a2	0	1	0	0	0	1	0	0
Centrilobular	Gosr1	0.558077	0	0.17	-0.07	0.07	0.09	0.43	0.07	0.22				Centrilobular	Gosr1	0	1	0	1	1	1	1	1				Centrilobular	Gosr1	0	0	0	0	0	0	0	0				Centrilobular	Gosr1	0	0	1	0	0	0	0	0
Centrilobular	Tenm2	0.637625	0	-0.21	-0.26	-0.08	0	-0.34	-0.24	0				Centrilobular	Tenm2	0	0	0	0	0	0	0	0				Centrilobular	Tenm2	0	0	0	0	0	0	0	0				Centrilobular	Tenm2	0	1	1	1	0	1	1	0
Centrilobular	Bhlha15	0.898048	0	0	0	0.47	0.42	0	0	0.4				Centrilobular	Bhlha15	0	0	0	1	1	0	0	1				Centrilobular	Bhlha15	0	0	0	0	0	0	0	0				Centrilobular	Bhlha15	0	0	0	0	0	0	0	0
Centrilobular	Pfn2	1.10558	0	0	0	0	-0.32	0.33	0.29	0				Centrilobular	Pfn2	0	0	0	0	0	1	1	0				Centrilobular	Pfn2	0	0	0	0	0	0	0	0				Centrilobular	Pfn2	0	0	0	0	1	0	0	0
Centrilobular	App	1.91589	0.23	0.25	0.3	0	0	0.51	0	0				Centrilobular	App	1	1	1	0	0	1	0	0				Centrilobular	App	0	0	0	0	0	0	0	0				Centrilobular	App	0	0	0	0	0	0	0	0
Macrovesicular	Polr3g	-0.894101	0	0	0.44	0	0	0.21	0.91	0.27				Macrovesicular	Polr3g	0	0	0	0	0	0	0	0				Macrovesicular	Polr3g	0	0	0	0	0	0	0	0				Macrovesicular	Polr3g	0	0	1	0	0	1	1	1
Macrovesicular	Dop1b	-0.64442	0	-0.08	0.05	0	0	-0.16	0	-0.14				Macrovesicular	Dop1b	0	1	0	0	0	1	0	1				Macrovesicular	Dop1b	0	0	0	0	0	0	0	0				Macrovesicular	Dop1b	0	0	1	0	0	0	0	0
Macrovesicular	Ces1c	-0.424915	0.22	-0.11	0.11	0	0.19	-0.09	0.24	0				Macrovesicular	Ces1c	0	1	0	0	0	1	0	0				Macrovesicular	Ces1c	0	0	0	0	0	0	0	0				Macrovesicular	Ces1c	1	0	1	0	1	0	1	0
Macrovesicular	Tcea3	-0.405477	-0.13	0	0.31	0	0.16	-0.09	0.28	0				Macrovesicular	Tcea3	1	0	0	0	0	1	0	0				Macrovesicular	Tcea3	0	0	0	0	0	0	0	0				Macrovesicular	Tcea3	0	0	1	0	1	0	1	0
Macrovesicular	Lrp1	-0.398518	-0.29	0	0	0	0	0.18	-0.21	0.21				Macrovesicular	Lrp1	1	0	0	0	0	0	1	0				Macrovesicular	Lrp1	0	0	0	0	0	0	0	0				Macrovesicular	Lrp1	0	0	0	0	0	1	0	1
Macrovesicular	Gstp1	-0.292586	2.13	0	0	0	0	-0.21	0.94	0				Macrovesicular	Gstp1	0	0	0	0	0	1	0	0				Macrovesicular	Gstp1	0	0	0	0	0	0	0	0				Macrovesicular	Gstp1	1	0	0	0	0	0	1	0
Macrovesicular	Rprm	-0.0782085	-0.92	0.18	-0.4	0	-0.57	0.53	-0.79	0.52				Macrovesicular	Rprm	1	0	1	0	1	0	1	0				Macrovesicular	Rprm	1	0	0	0	0	0	1	0				Macrovesicular	Rprm	0	1	0	0	0	1	0	1
Macrovesicular	Adgrg2	-0.0777895	0	0.39	0	0.46	0.42	0.84	0.39	0.95				Macrovesicular	Adgrg2	0	0	0	0	0	0	0	0				Macrovesicular	Adgrg2	0	0	0	0	0	0	0	0				Macrovesicular	Adgrg2	0	1	0	1	1	1	1	1
Macrovesicular	Trim17	-0.0633295	0	-0.09	-0.17	-0.14	0	-0.24	-0.19	-0.26				Macrovesicular	Trim17	0	1	1	1	0	1	1	1				Macrovesicular	Trim17	0	0	0	0	0	0	0	0				Macrovesicular	Trim17	0	0	0	0	0	0	0	0
Macrovesicular	Fam13a	-0.0465227	0	-0.8	-0.17	-0.26	0	-0.78	0	-0.82				Macrovesicular	Fam13a	0	1	1	1	0	1	0	1				Macrovesicular	Fam13a	0	1	0	0	0	1	0	1				Macrovesicular	Fam13a	0	0	0	0	0	0	0	0
Macrovesicular	Npas2	-0.0435401	-1.4	-0.54	-0.75	-0.35	-0.92	-0.69	-0.42	0.45				Macrovesicular	Npas2	1	1	1	1	1	1	1	0				Macrovesicular	Npas2	1	0	1	0	1	1	0	0				Macrovesicular	Npas2	0	0	0	0	0	0	0	1
Macrovesicular	Nrg1	-0.0284761	0.26	0.16	0.14	0.08	0.12	0.21	0.27	0.11				Macrovesicular	Nrg1	0	0	0	0	0	0	0	0				Macrovesicular	Nrg1	0	0	0	0	0	0	0	0				Macrovesicular	Nrg1	1	1	1	1	1	1	1	1
Macrovesicular	Sult1a1	-0.0174985	0	-0.38	-0.27	0	0	-0.24	-0.15	-0.32				Macrovesicular	Sult1a1	0	1	1	0	0	1	1	1				Macrovesicular	Sult1a1	0	0	0	0	0	0	0	0				Macrovesicular	Sult1a1	0	0	0	0	0	0	0	0
Macrovesicular	Hspb1	0.0368721	0	0.47	0.41	0.89	-0.56	1.6	0.7	0.76				Macrovesicular	Hspb1	0	1	1	1	0	1	1	1				Macrovesicular	Hspb1	0	0	0	1	0	1	1	1				Macrovesicular	Hspb1	0	0	0	0	1	0	0	0
Macrovesicular	Rbp7	0.0537716	0	0.31	0.36	0	0	-0.11	0	-0.55				Macrovesicular	Rbp7	0	1	1	0	0	0	0	0				Macrovesicular	Rbp7	0	0	0	0	0	0	0	0				Macrovesicular	Rbp7	0	0	0	0	0	1	0	1
Macrovesicular	Meox2	0.0824183	-0.38	0.76	0.4	0.46	0	0.53	0.44	1.09				Macrovesicular	Meox2	0	1	1	1	0	1	1	1				Macrovesicular	Meox2	0	1	0	0	0	0	0	1				Macrovesicular	Meox2	1	0	0	0	0	0	0	0
Macrovesicular	Serpina6	0.100016	-1.01	0.25	0	-0.9	-0.86	0.39	-0.67	0				Macrovesicular	Serpina6	0	1	0	0	0	1	0	0				Macrovesicular	Serpina6	0	0	0	0	0	0	0	0				Macrovesicular	Serpina6	1	0	0	1	1	0	1	0
Macrovesicular	Tmem86a	0.110288	-0.19	-0.71	0	-0.33	0	-0.81	0	-0.61				Macrovesicular	Tmem86a	0	0	0	0	0	0	0	0				Macrovesicular	Tmem86a	0	0	0	0	0	0	0	0				Macrovesicular	Tmem86a	1	1	0	1	0	1	0	1
Macrovesicular	Cxcr4	0.148704	0	0	0	0	0	0	0.12	0				Macrovesicular	Cxcr4	0	0	0	0	0	0	1	0				Macrovesicular	Cxcr4	0	0	0	0	0	0	0	0				Macrovesicular	Cxcr4	0	0	0	0	0	0	0	0
Macrovesicular	Gas6	0.363473	-0.19	-0.62	0	-0.27	0.16	-0.73	-0.16	-0.5				Macrovesicular	Gas6	0	0	0	0	1	0	0	0				Macrovesicular	Gas6	0	0	0	0	0	0	0	0				Macrovesicular	Gas6	1	1	0	1	0	1	1	1
Macrovesicular	Pfn2	0.548197	0	0	0	0	-0.32	0.33	0.29	0				Macrovesicular	Pfn2	0	0	0	0	0	1	1	0				Macrovesicular	Pfn2	0	0	0	0	0	0	0	0				Macrovesicular	Pfn2	0	0	0	0	1	0	0	0
Macrovesicular	Lect2	0.940985	0	-0.55	-0.2	0	0	-0.62	-0.41	-0.6				Macrovesicular	Lect2	0	0	0	0	0	0	0	0				Macrovesicular	Lect2	0	0	0	0	0	0	0	0				Macrovesicular	Lect2	0	1	1	0	0	1	1	1
Macrovesicular	Rab3d	1.01943	0.29	0.16	0.14	0.17	0	-0.1	0.15	0				Macrovesicular	Rab3d	1	1	1	1	0	0	1	0				Macrovesicular	Rab3d	0	0	0	0	0	0	0	0				Macrovesicular	Rab3d	0	0	0	0	0	1	0	0
Macrovesicular	App	1.71576	0.23	0.25	0.3	0	0	0.51	0	0				Macrovesicular	App	1	1	1	0	0	1	0	0				Macrovesicular	App	0	0	0	0	0	0	0	0				Macrovesicular	App	0	0	0	0	0	0	0	0
Periportal	Cdkn2b	-0.411898	0	0.05	0.1	0	0	0.03	0.07	0				Periportal	Cdkn2b	0	0	0	0	0	0	0	0				Periportal	Cdkn2b	0	0	0	0	0	0	0	0				Periportal	Cdkn2b	0	1	1	0	0	1	1	0
Periportal	Neu2	-0.33872	0	-0.18	-0.19	0	0	0.12	0	0				Periportal	Neu2	0	1	1	0	0	0	0	0				Periportal	Neu2	0	0	0	0	0	0	0	0				Periportal	Neu2	0	0	0	0	0	1	0	0
Periportal	Tf	-0.309182	0.07	-0.8	0.29	0	0	-1.8	0.3	-0.88				Periportal	Tf	0	1	0	0	0	1	0	1				Periportal	Tf	0	1	0	0	0	1	0	1				Periportal	Tf	1	0	1	0	0	0	1	0
Periportal	Gnmt	-0.210163	-0.28	-0.31	0	0	-0.28	-0.14	-0.21	0				Periportal	Gnmt	1	1	0	0	1	1	1	0				Periportal	Gnmt	0	0	0	0	0	0	0	0				Periportal	Gnmt	0	0	0	0	0	0	0	0
Periportal	Hmgcr	-0.123086	0.84	0	0.51	0	0	-0.38	0.97	-0.93				Periportal	Hmgcr	0	0	0	0	0	1	0	1				Periportal	Hmgcr	0	0	0	0	0	0	0	1				Periportal	Hmgcr	1	0	1	0	0	0	1	0
Periportal	Gck	-0.109089	0	0	-0.4	0.54	0	0.28	0	-0.92				Periportal	Gck	0	0	1	0	0	0	0	1				Periportal	Gck	0	0	0	0	0	0	0	1				Periportal	Gck	0	0	0	1	0	1	0	0
Periportal	Adh5	-0.102448	0.24	1.07	0.68	0.5	0.27	1.95	1.27	0.87				Periportal	Adh5	0	0	0	0	0	0	0	0				Periportal	Adh5	0	0	0	0	0	0	0	0				Periportal	Adh5	1	1	1	1	1	1	1	1
Periportal	Ppp1r3c	-0.0677232	0.35	-0.96	0	0	0	-1.08	-0.36	-0.95				Periportal	Ppp1r3c	0	1	0	0	0	1	1	1				Periportal	Ppp1r3c	0	1	0	0	0	1	0	1				Periportal	Ppp1r3c	1	0	0	0	0	0	0	0
Periportal	Hamp	-0.0212819	0	-1.08	0	0	0	-1.37	0	-1.4				Periportal	Hamp	0	1	0	0	0	1	0	1				Periportal	Hamp	0	1	0	0	0	1	0	1				Periportal	Hamp	0	0	0	0	0	0	0	0
Periportal	Insig1	-0.0154003	0.63	1.89	0	0	0	0	-0.9	0				Periportal	Insig1	0	0	0	0	0	0	1	0				Periportal	Insig1	0	0	0	0	0	0	1	0				Periportal	Insig1	1	1	0	0	0	0	0	0
Periportal	Hdc	0.0599731	0	5.17	0.56	1.54	0	6.68	1.17	4.13				Periportal	Hdc	0	1	1	1	0	1	1	1				Periportal	Hdc	0	1	0	1	0	1	1	1				Periportal	Hdc	0	0	0	0	0	0	0	0
Periportal	Snx10	0.0764565	0.63	1.42	0.58	0.63	0.55	1.96	1.35	1.24				Periportal	Snx10	1	1	1	1	1	1	1	1				Periportal	Snx10	1	1	0	1	0	1	1	1				Periportal	Snx10	0	0	0	0	0	0	0	0
Periportal	Abcg5	0.114627	-0.83	-2.47	-0.89	-1.34	-1.11	-2.97	-0.38	-2.07				Periportal	Abcg5	0	0	0	0	0	0	0	0				Periportal	Abcg5	0	0	0	0	0	0	0	0				Periportal	Abcg5	1	1	1	1	1	1	1	1
Periportal	Rab3d	0.125064	0.29	0.16	0.14	0.17	0	-0.1	0.15	0				Periportal	Rab3d	1	1	1	1	0	0	1	0				Periportal	Rab3d	0	0	0	0	0	0	0	0				Periportal	Rab3d	0	0	0	0	0	1	0	0
Periportal	Ggt1	0.154803	0.32	0.28	0.38	0.23	0.27	0	0.58	0.12				Periportal	Ggt1	1	1	1	1	1	0	1	1				Periportal	Ggt1	0	0	0	0	0	0	0	0				Periportal	Ggt1	0	0	0	0	0	0	0	0
Periportal	Pfn2	0.27036	0	0	0	0	-0.32	0.33	0.29	0				Periportal	Pfn2	0	0	0	0	0	1	1	0				Periportal	Pfn2	0	0	0	0	0	0	0	0				Periportal	Pfn2	0	0	0	0	1	0	0	0
Periportal	Nipal1	0.282183	-0.54	-0.22	-0.15	-0.16	0	-0.22	-0.17	0				Periportal	Nipal1	0	0	0	0	0	0	0	0				Periportal	Nipal1	0	0	0	0	0	0	0	0				Periportal	Nipal1	1	1	1	1	0	1	1	0
Periportal	Nrep	0.342621	-1.2	-1.6	-1.01	-1.15	-0.56	-1.77	-1.59	0				Periportal	Nrep	0	0	0	0	0	0	0	0				Periportal	Nrep	0	0	0	0	0	0	0	0				Periportal	Nrep	1	1	1	1	1	1	1	0
Periportal	Ctsw	0.364709	0	-0.16	0	0	0.11	-0.26	0	0				Periportal	Ctsw	0	0	0	0	1	0	0	0				Periportal	Ctsw	0	0	0	0	0	0	0	0				Periportal	Ctsw	0	1	0	0	0	1	0	0
Periportal	Tmem139	0.440682	0	-0.34	-0.1	0	0	-0.35	-0.13	-0.09				Periportal	Tmem139	0	0	0	0	0	0	0	0				Periportal	Tmem139	0	0	0	0	0	0	0	0				Periportal	Tmem139	0	1	1	0	0	1	1	1
Periportal	Tekt5	0.469074	0	-0.17	-0.1	-0.13	0	-0.19	-0.08	-0.13				Periportal	Tekt5	0	0	0	0	0	0	0	0				Periportal	Tekt5	0	0	0	0	0	0	0	0				Periportal	Tekt5	0	1	1	1	0	1	1	1
Periportal	Nol3	0.606713	0	0	0	0	0	0.84	0.81	0.26				Periportal	Nol3	0	0	0	0	0	1	1	1				Periportal	Nol3	0	0	0	0	0	1	1	0				Periportal	Nol3	0	0	0	0	0	0	0	0
Periportal	Fcrla	0.608543	-0.16	0	0	-0.11	0	-0.24	-0.09	0				Periportal	Fcrla	0	0	0	0	0	0	0	0				Periportal	Fcrla	0	0	0	0	0	0	0	0				Periportal	Fcrla	1	0	0	1	0	1	1	0
Periportal	Fam210b	0.684749	0	-0.28	-0.19	0	0	-0.52	-0.37	0				Periportal	Fam210b	0	0	0	0	0	0	0	0				Periportal	Fam210b	0	0	0	0	0	0	0	0				Periportal	Fam210b	0	1	1	0	0	1	1	0
Periportal	Per3	0.872708	0.2	0.35	0	0.16	0.14	0.14	-0.07	0				Periportal	Per3	1	1	0	1	1	1	0	0				Periportal	Per3	0	0	0	0	0	0	0	0				Periportal	Per3	0	0	0	0	0	0	1	0
															97	16	37	26	20	15	42	31	29					97	3	11	2	3	1	10	8	11					97	25	37	35	24	23	48	43	32
																0.164948	0.381443	0.268041	0.206186	0.154639	0.43299	0.319588	0.298969						0.0309278	0.113402	0.0206186	0.0309278	0.0103093	0.103093	0.0824742	0.113402						0.257732	0.381443	0.360825	0.247423	0.237113	0.494845	0.443299	0.329897
Number of genes that follow the same direction of expected up/downregulation																																					Number of genes that are in opposite direction of expected up/downregulation
Gene set	Gene Symbol	2-3BF-1000_female	6-1FTOH-1000	10-2FTOH-475	PFHxSAm-111_female	2-3BF-1000_male	6-1FTOH-333	10-2FTOH-475	PFHxSAm-111_male		Gene set	Gene Symbol	2-3BF-1000-Female	6-1FTOH-1000-Female	10-2FTOH-475-Female	PFHxSAm-111-Female	2-3BF-1000-Male	6-1FTOH-333-Male	10-2FTOH-475-Male	PFHxSAm-111-Male		Gene set	Gene Symbol	2-3BF-1000-Female	6-1FTOH-1000-Female	10-2FTOH-475-Female	PFHxSAm-111-Female	2-3BF-1000-Male	6-1FTOH-333-Male	10-2FTOH-475-Male	PFHxSAm-111-Male							Gene set	Gene Symbol	2-3BF-1000_female	6-1FTOH-1000	10-2FTOH-475	PFHxSAm-111_female	2-3BF-1000_male	6-1FTOH-333	10-2FTOH-475	PFHxSAm-111_male		Gene set
Centrilobular	Ncoa5	0	0	0	0	0	0	1	0		Macrovesicular	Polr3g	0	0	0	0	0	0	0	0		Periportal	Cdkn2b	0	0	0	0	0	0	0	0							Centrilobular	Ncoa5	0	0	0	0	0	1	0	1		Macrovesicular
Centrilobular	Tmem50b	0	0	0	0	0	0	0	0		Macrovesicular	Dop1b	0	1	0	0	0	1	0	1		Periportal	Neu2	0	1	1	0	0	0	0	0							Centrilobular	Tmem50b	1	1	1	1	1	1	1	0		Macrovesicular
Centrilobular	Lifr	0	1	0	1	0	1	0	1		Macrovesicular	Ces1c	0	1	0	0	0	1	0	0		Periportal	Tf	0	1	0	0	0	1	0	1							Centrilobular	Lifr	0	0	0	0	1	0	0	0		Macrovesicular
Centrilobular	Vkorc1l1	0	0	1	0	0	0	0	0		Macrovesicular	Tcea3	1	0	0	0	0	1	0	0		Periportal	Gnmt	1	1	0	0	1	1	1	0							Centrilobular	Vkorc1l1	1	1	0	0	1	1	1	1		Macrovesicular
Centrilobular	Dusp8	0	0	0	0	0	0	0	0		Macrovesicular	Lrp1	1	0	0	0	0	0	1	0		Periportal	Hmgcr	0	0	0	0	0	1	0	1							Centrilobular	Dusp8	0	0	0	0	0	0	0	0		Macrovesicular
Centrilobular	Ric3	0	1	0	0	1	1	0	0		Macrovesicular	Gstp1	0	0	0	0	0	1	0	0		Periportal	Gck	0	0	1	0	0	0	0	1							Centrilobular	Ric3	0	0	0	1	0	0	0	1		Macrovesicular
Centrilobular	Dpt	0	1	0	1	0	1	0	1		Macrovesicular	Rprm	1	0	1	0	1	0	1	0		Periportal	Adh5	0	0	0	0	0	0	0	0							Centrilobular	Dpt	0	0	1	0	0	0	0	0		Macrovesicular
Centrilobular	Orm1	0	0	0	0	0	0	0	0		Macrovesicular	Adgrg2	0	0	0	0	0	0	0	0		Periportal	Ppp1r3c	0	1	0	0	0	1	1	1							Centrilobular	Orm1	1	1	1	1	1	1	1	1		Macrovesicular
Centrilobular	Rnf152	0	0	0	0	0	0	0	0		Macrovesicular	Trim17	0	1	1	1	0	1	1	1		Periportal	Hamp	0	1	0	0	0	1	0	1							Centrilobular	Rnf152	0	1	0	1	0	1	1	0		Macrovesicular
Centrilobular	Cryl1	0	0	0	0	0	0	0	0		Macrovesicular	Fam13a	0	1	1	1	0	1	0	1		Periportal	Insig1	0	0	0	0	0	0	1	0							Centrilobular	Cryl1	1	1	1	1	1	0	1	1		Macrovesicular
Centrilobular	Palmd	0	1	1	0	0	0	1	0		Macrovesicular	Npas2	1	1	1	1	1	1	1	0		Periportal	Hdc	0	1	1	1	0	1	1	1							Centrilobular	Palmd	0	0	0	0	1	1	0	1		Macrovesicular
Centrilobular	Ehhadh	1	0	0	0	1	0	0	0		Macrovesicular	Nrg1	0	0	0	0	0	0	0	0		Periportal	Snx10	1	1	1	1	1	1	1	1							Centrilobular	Ehhadh	0	1	1	1	0	1	1	1		Macrovesicular
Centrilobular	Rtn4rl1	0	0	1	1	0	0	1	0		Macrovesicular	Sult1a1	0	1	1	0	0	1	1	1		Periportal	Abcg5	0	0	0	0	0	0	0	0							Centrilobular	Rtn4rl1	0	1	0	0	0	1	0	1		Macrovesicular
Centrilobular	Gstp1	0	0	0	0	0	1	0	0		Macrovesicular	Hspb1	0	1	1	1	0	1	1	1		Periportal	Rab3d	1	1	1	1	0	0	1	0							Centrilobular	Gstp1	1	0	0	0	0	0	1	0		Macrovesicular
Centrilobular	Tf	0	1	0	0	0	1	0	1		Macrovesicular	Rbp7	0	1	1	0	0	0	0	0		Periportal	Ggt1	1	1	1	1	1	0	1	1							Centrilobular	Tf	1	0	1	0	0	0	1	0		Macrovesicular
Centrilobular	Tiparp	1	0	0	0	0	0	0	0		Macrovesicular	Meox2	0	1	1	1	0	1	1	1		Periportal	Pfn2	0	0	0	0	0	1	1	0							Centrilobular	Tiparp	0	1	0	0	1	1	1	1		Macrovesicular
Centrilobular	Ecel1	0	0	1	0	0	1	1	0		Macrovesicular	Serpina6	0	1	0	0	0	1	0	0		Periportal	Nipal1	0	0	0	0	0	0	0	0							Centrilobular	Ecel1	0	0	0	0	0	0	0	0		Macrovesicular
Centrilobular	Arhgap21	0	1	0	0	0	1	0	1		Macrovesicular	Tmem86a	0	0	0	0	0	0	0	0		Periportal	Nrep	0	0	0	0	0	0	0	0							Centrilobular	Arhgap21	0	0	0	0	0	0	0	0		Macrovesicular
Centrilobular	Ptgr1	0	1	0	0	0	1	0	1		Macrovesicular	Cxcr4	0	0	0	0	0	0	1	0		Periportal	Ctsw	0	0	0	0	1	0	0	0							Centrilobular	Ptgr1	1	0	1	0	1	0	1	0		Macrovesicular
Centrilobular	Ccdc113	0	1	1	0	0	1	1	1		Macrovesicular	Gas6	0	0	0	0	1	0	0	0		Periportal	Tmem139	0	0	0	0	0	0	0	0							Centrilobular	Ccdc113	0	0	0	0	0	0	0	0		Macrovesicular
Centrilobular	Serpina5	0	0	0	0	0	0	0	0		Macrovesicular	Pfn2	0	0	0	0	0	1	1	0		Periportal	Tekt5	0	0	0	0	0	0	0	0							Centrilobular	Serpina5	0	1	1	1	0	1	1	0		Macrovesicular
Centrilobular	Mybl1	0	0	0	0	0	0	0	1		Macrovesicular	Lect2	0	0	0	0	0	0	0	0		Periportal	Nol3	0	0	0	0	0	1	1	1							Centrilobular	Mybl1	0	0	0	0	0	0	0	0		Macrovesicular
Centrilobular	B3gnt2	0	0	0	0	0	1	0	0		Macrovesicular	Rab3d	1	1	1	1	0	0	1	0		Periportal	Fcrla	0	0	0	0	0	0	0	0							Centrilobular	B3gnt2	0	1	1	1	0	0	1	1		Macrovesicular
Centrilobular	Trim47	0	1	0	0	0	1	0	1		Macrovesicular	App	1	1	1	0	0	1	0	0		Periportal	Fam210b	0	0	0	0	0	0	0	0							Centrilobular	Trim47	0	0	1	0	0	0	0	0		Macrovesicular
Centrilobular	Birc3	1	0	0	0	0	0	0	0				6	12	10	6	3	13	10	6		Periportal	Per3	1	1	0	1	1	1	0	0							Centrilobular	Birc3	0	0	0	0	0	1	1	0
Centrilobular	Nol3	0	0	0	0	0	0	0	0															5	10	6	5	5	10	9	9							Centrilobular	Nol3	0	0	0	0	0	1	1	1
Centrilobular	Entpd8	1	0	0	0	0	0	0	0																													Centrilobular	Entpd8	0	1	1	0	0	1	0	1
Centrilobular	Apc	0	1	1	0	0	1	1	1																													Centrilobular	Apc	0	0	0	0	0	0	0	0
Centrilobular	Camta1	0	1	0	1	1	1	0	1																													Centrilobular	Camta1	0	0	0	0	0	0	1	0
Centrilobular	Cry1	0	0	0	0	0	0	0	0																													Centrilobular	Cry1	0	1	1	0	1	1	1	1
Centrilobular	Xcl1	0	0	0	0	0	0	0	0																													Centrilobular	Xcl1	0	1	0	1	0	1	0	0
Centrilobular	Svil	0	0	0	1	0	0	0	0																													Centrilobular	Svil	0	0	0	0	0	1	0	0
Centrilobular	Manba	0	0	0	0	1	0	0	0																													Centrilobular	Manba	0	1	1	0	0	1	0	1
Centrilobular	Oat	0	0	0	0	0	0	0	0																													Centrilobular	Oat	1	1	1	0	1	1	1	1
Centrilobular	Pak1	0	1	1	1	0	1	1	0																													Centrilobular	Pak1	0	0	0	0	0	0	0	0
Centrilobular	Ly49si1	0	0	1	0	0	0	1	0																													Centrilobular	Ly49si1	0	1	0	0	0	1	0	0
Centrilobular	Cyp26b1	0	1	0	0	0	0	1	0																													Centrilobular	Cyp26b1	0	0	0	0	0	1	0	0
Centrilobular	Etv1	0	0	0	0	0	1	0	0																													Centrilobular	Etv1	0	0	0	0	0	0	1	0
Centrilobular	Col27a1	0	0	0	0	0	0	0	0																													Centrilobular	Col27a1	1	1	1	1	1	1	1	1
Centrilobular	Lect2	0	0	0	0	0	0	0	0																													Centrilobular	Lect2	0	1	1	0	0	1	1	1
Centrilobular	Emb	0	0	1	0	0	0	1	0																													Centrilobular	Emb	0	1	0	1	0	1	0	1
Centrilobular	Tfap2c	0	0	0	0	1	1	0	1																													Centrilobular	Tfap2c	0	0	1	0	0	0	1	0
Centrilobular	Slc15a2	0	0	0	1	0	0	0	1																													Centrilobular	Slc15a2	0	1	0	0	0	1	0	0
Centrilobular	Gosr1	0	1	0	1	1	1	1	1																													Centrilobular	Gosr1	0	0	1	0	0	0	0	0
Centrilobular	Tenm2	0	0	0	0	0	0	0	0																													Centrilobular	Tenm2	0	1	1	1	0	1	1	0
Centrilobular	Bhlha15	0	0	0	1	1	0	0	1																													Centrilobular	Bhlha15	0	0	0	0	0	0	0	0
Centrilobular	Pfn2	0	0	0	0	0	1	1	0																													Centrilobular	Pfn2	0	0	0	0	1	0	0	0
Centrilobular	App	1	1	1	0	0	1	0	0																													Centrilobular	App	0	0	0	0	0	0	0	0
		5	15	10	9	7	19	12	14																															9	21	19	12	12	25	22	18
Number of genes that follow the same direction of expected up/downregulation and have FC ≥ 0.6 or FC ≤ -0.6																																					Number of genes that are in opposite direction of expected up/downregulation and have FC ≥ 0.6 or FC ≤ -0.6
Gene set	Gene Symbol	2-3BF-1000_female	6-1FTOH-1000	10-2FTOH-475	PFHxSAm-111_female	2-3BF-1000_male	6-1FTOH-333	10-2FTOH-475	PFHxSAm-111_male		Gene set	Gene Symbol	2-3BF-1000-Female	6-1FTOH-1000-Female	10-2FTOH-475-Female	PFHxSAm-111-Female	2-3BF-1000-Male	6-1FTOH-333-Male	10-2FTOH-475-Male	PFHxSAm-111-Male		Gene set	Gene Symbol	2-3BF-1000-Female	6-1FTOH-1000-Female	10-2FTOH-475-Female	PFHxSAm-111-Female	2-3BF-1000-Male	6-1FTOH-333-Male	10-2FTOH-475-Male	PFHxSAm-111-Male							Gene set	Gene Symbol	2-3BF-1000_female	6-1FTOH-1000	10-2FTOH-475	PFHxSAm-111_female	2-3BF-1000_male	6-1FTOH-333	10-2FTOH-475	PFHxSAm-111_male		Gene set
Centrilobular	Ncoa5	0	0	0	0	0	0	0	0		Macrovesicular	Polr3g	0	0	0	0	0	0	0	0		Periportal	Cdkn2b	0	0	0	0	0	0	0	0							Centrilobular	Ncoa5	0	0	0	0	0	0	0	0		Macrovesicular
Centrilobular	Tmem50b	0	0	0	0	0	0	0	0		Macrovesicular	Dop1b	0	0	0	0	0	0	0	0		Periportal	Neu2	0	0	0	0	0	0	0	0							Centrilobular	Tmem50b	0	0	0	0	0	0	0	0		Macrovesicular
Centrilobular	Lifr	0	1	0	0	0	0	0	0		Macrovesicular	Ces1c	0	0	0	0	0	0	0	0		Periportal	Tf	0	1	0	0	0	1	0	1							Centrilobular	Lifr	0	0	0	0	0	0	0	0		Macrovesicular
Centrilobular	Vkorc1l1	0	0	0	0	0	0	0	0		Macrovesicular	Tcea3	0	0	0	0	0	0	0	0		Periportal	Gnmt	0	0	0	0	0	0	0	0							Centrilobular	Vkorc1l1	0	0	0	0	0	0	0	0		Macrovesicular
Centrilobular	Dusp8	0	0	0	0	0	0	0	0		Macrovesicular	Lrp1	0	0	0	0	0	0	0	0		Periportal	Hmgcr	0	0	0	0	0	0	0	1							Centrilobular	Dusp8	0	0	0	0	0	0	0	0		Macrovesicular
Centrilobular	Ric3	0	0	0	0	0	0	0	0		Macrovesicular	Gstp1	0	0	0	0	0	0	0	0		Periportal	Gck	0	0	0	0	0	0	0	1							Centrilobular	Ric3	0	0	0	0	0	0	0	0		Macrovesicular
Centrilobular	Dpt	0	1	0	0	0	0	0	0		Macrovesicular	Rprm	1	0	0	0	0	0	1	0		Periportal	Adh5	0	0	0	0	0	0	0	0							Centrilobular	Dpt	0	0	0	0	0	0	0	0		Macrovesicular
Centrilobular	Orm1	0	0	0	0	0	0	0	0		Macrovesicular	Adgrg2	0	0	0	0	0	0	0	0		Periportal	Ppp1r3c	0	1	0	0	0	1	0	1							Centrilobular	Orm1	1	1	1	1	1	1	1	1		Macrovesicular
Centrilobular	Rnf152	0	0	0	0	0	0	0	0		Macrovesicular	Trim17	0	0	0	0	0	0	0	0		Periportal	Hamp	0	1	0	0	0	1	0	1							Centrilobular	Rnf152	0	0	0	0	0	0	0	0		Macrovesicular
Centrilobular	Cryl1	0	0	0	0	0	0	0	0		Macrovesicular	Fam13a	0	1	0	0	0	1	0	1		Periportal	Insig1	0	0	0	0	0	0	1	0							Centrilobular	Cryl1	1	0	1	0	1	0	1	0		Macrovesicular
Centrilobular	Palmd	0	0	0	0	0	0	0	0		Macrovesicular	Npas2	1	0	1	0	1	1	0	0		Periportal	Hdc	0	1	0	1	0	1	1	1							Centrilobular	Palmd	0	0	0	0	0	0	0	0		Macrovesicular
Centrilobular	Ehhadh	0	0	0	0	0	0	0	0		Macrovesicular	Nrg1	0	0	0	0	0	0	0	0		Periportal	Snx10	1	1	0	1	0	1	1	1							Centrilobular	Ehhadh	0	1	1	1	0	1	1	1		Macrovesicular
Centrilobular	Rtn4rl1	0	0	0	0	0	0	0	0		Macrovesicular	Sult1a1	0	0	0	0	0	0	0	0		Periportal	Abcg5	0	0	0	0	0	0	0	0							Centrilobular	Rtn4rl1	0	0	0	0	0	1	0	0		Macrovesicular
Centrilobular	Gstp1	0	0	0	0	0	0	0	0		Macrovesicular	Hspb1	0	0	0	1	0	1	1	1		Periportal	Rab3d	0	0	0	0	0	0	0	0							Centrilobular	Gstp1	1	0	0	0	0	0	1	0		Macrovesicular
Centrilobular	Tf	0	1	0	0	0	1	0	1		Macrovesicular	Rbp7	0	0	0	0	0	0	0	0		Periportal	Ggt1	0	0	0	0	0	0	0	0							Centrilobular	Tf	0	0	0	0	0	0	0	0		Macrovesicular
Centrilobular	Tiparp	0	0	0	0	0	0	0	0		Macrovesicular	Meox2	0	1	0	0	0	0	0	1		Periportal	Pfn2	0	0	0	0	0	0	0	0							Centrilobular	Tiparp	0	0	0	0	0	0	0	0		Macrovesicular
Centrilobular	Ecel1	0	0	0	0	0	0	0	0		Macrovesicular	Serpina6	0	0	0	0	0	0	0	0		Periportal	Nipal1	0	0	0	0	0	0	0	0							Centrilobular	Ecel1	0	0	0	0	0	0	0	0		Macrovesicular
Centrilobular	Arhgap21	0	0	0	0	0	0	0	0		Macrovesicular	Tmem86a	0	0	0	0	0	0	0	0		Periportal	Nrep	0	0	0	0	0	0	0	0							Centrilobular	Arhgap21	0	0	0	0	0	0	0	0		Macrovesicular
Centrilobular	Ptgr1	0	0	0	0	0	0	0	0		Macrovesicular	Cxcr4	0	0	0	0	0	0	0	0		Periportal	Ctsw	0	0	0	0	0	0	0	0							Centrilobular	Ptgr1	0	0	0	0	0	0	1	0		Macrovesicular
Centrilobular	Ccdc113	0	0	0	0	0	0	0	0		Macrovesicular	Gas6	0	0	0	0	0	0	0	0		Periportal	Tmem139	0	0	0	0	0	0	0	0							Centrilobular	Ccdc113	0	0	0	0	0	0	0	0		Macrovesicular
Centrilobular	Serpina5	0	0	0	0	0	0	0	0		Macrovesicular	Pfn2	0	0	0	0	0	0	0	0		Periportal	Tekt5	0	0	0	0	0	0	0	0							Centrilobular	Serpina5	0	0	0	0	0	0	0	0		Macrovesicular
Centrilobular	Mybl1	0	0	0	0	0	0	0	0		Macrovesicular	Lect2	0	0	0	0	0	0	0	0		Periportal	Nol3	0	0	0	0	0	1	1	0							Centrilobular	Mybl1	0	0	0	0	0	0	0	0		Macrovesicular
Centrilobular	B3gnt2	0	0	0	0	0	0	0	0		Macrovesicular	Rab3d	0	0	0	0	0	0	0	0		Periportal	Fcrla	0	0	0	0	0	0	0	0							Centrilobular	B3gnt2	0	0	0	0	0	0	0	0		Macrovesicular
Centrilobular	Trim47	0	0	0	0	0	0	0	0		Macrovesicular	App	0	0	0	0	0	0	0	0		Periportal	Fam210b	0	0	0	0	0	0	0	0							Centrilobular	Trim47	0	0	0	0	0	0	0	0		Macrovesicular
Centrilobular	Birc3	0	0	0	0	0	0	0	0				2	2	1	1	1	3	2	3		Periportal	Per3	0	0	0	0	0	0	0	0							Centrilobular	Birc3	0	0	0	0	0	1	1	0
Centrilobular	Nol3	0	0	0	0	0	0	0	0															1	5	0	2	0	6	4	7							Centrilobular	Nol3	0	0	0	0	0	1	1	0
Centrilobular	Entpd8	0	0	0	0	0	0	0	0																													Centrilobular	Entpd8	0	0	0	0	0	0	0	0
Centrilobular	Apc	0	0	0	0	0	0	0	0																													Centrilobular	Apc	0	0	0	0	0	0	0	0
Centrilobular	Camta1	0	0	0	0	0	0	0	0																													Centrilobular	Camta1	0	0	0	0	0	0	0	0
Centrilobular	Cry1	0	0	0	0	0	0	0	0																													Centrilobular	Cry1	0	0	0	0	0	0	0	0
Centrilobular	Xcl1	0	0	0	0	0	0	0	0																													Centrilobular	Xcl1	0	0	0	0	0	0	0	0
Centrilobular	Svil	0	0	0	0	0	0	0	0																													Centrilobular	Svil	0	0	0	0	0	0	0	0
Centrilobular	Manba	0	0	0	0	0	0	0	0																													Centrilobular	Manba	0	0	0	0	0	0	0	0
Centrilobular	Oat	0	0	0	0	0	0	0	0																													Centrilobular	Oat	0	0	0	0	0	1	1	0
Centrilobular	Pak1	0	1	0	0	0	0	1	0																													Centrilobular	Pak1	0	0	0	0	0	0	0	0
Centrilobular	Ly49si1	0	0	1	0	0	0	0	0																													Centrilobular	Ly49si1	0	1	0	0	0	0	0	0
Centrilobular	Cyp26b1	0	0	0	0	0	0	1	0																													Centrilobular	Cyp26b1	0	0	0	0	0	0	0	0
Centrilobular	Etv1	0	0	0	0	0	0	0	0																													Centrilobular	Etv1	0	0	0	0	0	0	0	0
Centrilobular	Col27a1	0	0	0	0	0	0	0	0																													Centrilobular	Col27a1	0	0	0	0	0	0	0	0
Centrilobular	Lect2	0	0	0	0	0	0	0	0																													Centrilobular	Lect2	0	0	0	0	0	1	0	1
Centrilobular	Emb	0	0	0	0	0	0	0	0																													Centrilobular	Emb	0	0	0	0	0	0	0	0
Centrilobular	Tfap2c	0	0	0	0	0	0	0	0																													Centrilobular	Tfap2c	0	0	0	0	0	0	0	0
Centrilobular	Slc15a2	0	0	0	0	0	0	0	0																													Centrilobular	Slc15a2	0	0	0	0	0	0	0	0
Centrilobular	Gosr1	0	0	0	0	0	0	0	0																													Centrilobular	Gosr1	0	0	0	0	0	0	0	0
Centrilobular	Tenm2	0	0	0	0	0	0	0	0																													Centrilobular	Tenm2	0	0	0	0	0	0	0	0
Centrilobular	Bhlha15	0	0	0	0	0	0	0	0																													Centrilobular	Bhlha15	0	0	0	0	0	0	0	0
Centrilobular	Pfn2	0	0	0	0	0	0	0	0																													Centrilobular	Pfn2	0	0	0	0	0	0	0	0
Centrilobular	App	0	0	0	0	0	0	0	0																													Centrilobular	App	0	0	0	0	0	0	0	0
		0	4	1	0	0	1	2	1																															3	3	3	2	2	7	8	3
[truncated: 19 more columns]

## Sheet: Counts_Summary
Number of genes that follow expected or opposite expression
			Similar expression pattern
	Gene set		# genes	Female							Male
				2,3 BF	6:1 FTOH		10:2 FTOH		PFHxSAm		2,3 BF	6:1 FTOH		10:2 FTOH		PFHxSam
	Centrilobular		48	5	15		10		9		7	19		12		14
	Macrovesicular		24	6	12		10		6		3	13		10		6
	Periportal		25	5	10		6		5		5	10		9		9
			Opposite expression pattern
	Gene set		# genes	Female							Male
				2,3 BF	6:1 FTOH		10:2 FTOH		PFHxSAm		2,3 BF	6:1 FTOH		10:2 FTOH		PFHxSam
	Centrilobular		48	9	21		19		12		12	25		22		18
	Macrovesicular		24	7	6		6		5		7	10		9		10
	Periportal		25	9	10		10		7		4	13		12		4
Number of genes that follow expected or opposite expression and meet FC criterion
			Similar expression pattern
	Gene set		# genes	Female							Male
				2,3 BF	6:1 FTOH		10:2 FTOH		PFHxSAm		2,3 BF	6:1 FTOH		10:2 FTOH		PFHxSam
	Centrilobular		48	0	4		1		0		0	1		2		1
	Macrovesicular		24	2	2		1		1		1	3		2		3
	Periportal		25	1	5		0		2		0	6		4		7
			Opposite expression pattern
	Gene set		# genes	Female							Male
				2,3 BF	6:1 FTOH		10:2 FTOH		PFHxSAm		2,3 BF	6:1 FTOH		10:2 FTOH		PFHxSam
	Centrilobular		48	3	3		3		2		2	7		8		3
	Macrovesicular		24	2	2		0		1		1	4		3		3
	Periportal		25	4	4		3		2		1	3		3		2
