# Supplementary material for: Exposure to PFAS chemicals induces sex-dependent alterations in key rate-limiting steps of lipid metabolism in liver steatosis
Source: Front Toxicol. 2024 Jun 5;6:1390196. doi: 10.3389/ftox.2024.1390196 (PMC11188372; doi:10.3389/ftox.2024.1390196)
Supplement: Supplementary file 4 [file DataSheet1.xlsx]

## Sheet: Contents
Sheet Name	Description
MIE-LIST	Final list of molecular initiating events
MIE-Targets-TRRUST	Target genes of the molecular initiating events obtatined from TRRUST database
Cytoscape-input	Input file to generate network diagram on Cytoscape
Fatty liver-AOPs	AOPs for "fatty liver" from https://aopdb.epa.gov/
Steatosis-AOPs	AOPs for "steatosis" from https://aopdb.epa.gov/
Fatty liver-MIEs	MIEs for "fatty liver" AOPs from https://aopwiki.org/
Steatosis-MIEs	MIEs for "steatosis" AOPs from https://aopwiki.org/

## Sheet: MIE-LIST
MIEs	Source(s)
ABCB11	AOP: Fatty liver
CYP19A1	AOP: Fatty liver							ToxProfiler:	https://toxpro.bhsai.org/login
CYP2E1	AOP: Fatty liver
EGFR	AOP: Fatty liver
NIS	AOP: Fatty liver							AOP:	https://aopdb.epa.gov/
NR1I2	AOP: Fatty liver								https://aopwiki.org/
TRPA1	AOP: Fatty liver
VEGFR2	AOP: Fatty liver
VKOR	AOP: Fatty liver
HNF4A	AOP: Fatty liver; AOP:Steatosis
NRF2	AOP: Fatty liver; AOP:Steatosis
PPARB	AOP: Fatty liver; AOP:Steatosis
CAR/NR1I3	AOP: Fatty liver; AOP:Steatosis; Mellor et al.
LXRA/LXRB/NR1H2/NR1H3	AOP: Fatty liver; AOP:Steatosis; Mellor et al.
NFE2/NRF2	AOP:Steatosis
FXR/NR1H4	AOP:Steatosis; Mellor et al.
RXRA	Mellor et al.
SREBF1	Mellor et al.
RARA/RARB/RARG/NR1B1/NR1B2/NR1B3	Mellor et al.
ADORA2A	ToxProfiler
SLC6A2	ToxProfiler
AR	ToxProfiler; AOP: Fatty liver
GR/NR3C1	ToxProfiler; AOP: Fatty liver; AOP: Steatosis; Mellor et al.
PPARG	ToxProfiler; AOP: Fatty liver; AOP: Steatosis; Mellor et al.
PPARA	ToxProfiler; AOP: Fatty liver; AOP:Steatosis; Mellor et al.
AHR	ToxProfiler; AOP: Fatty liver; AOP:Steatosis; Mellor et al.
ESR1/ESR2	ToxProfiler; AOP: Fatty liver; AOP:Steatosis; Mellor et al.
PXR/SXR	ToxProfiler; AOP: Fatty liver; AOP:Steatosis; Mellor et al.

## Sheet: Cytoscape-input
Source	Target	2-3BF-1000_male	6-1FTOH-333_male	10-2FTOH-475_male	PFHxSAm-111_male	2-3BF-1000_female	6-1FTOH-1000_female	10-2FTOH-475_female	PFHxSAm-111_female
AHR	Abcg2	0.00040723	1.1435	0.630509	0.592096	0.0515321	0.846865	0.254	0.213729
AHR	Arnt	-0.201369	-0.0768088	-0.142033	0	-0.256483	-0.176433	-0.246266	-0.189085
AHR	Brca1	0.312708	0.539525	0.581108	0	0.348664	0.906473	-0.075422	-0.39772
AHR	Ccnd1	-0.63735	0.705762	-0.434003	0.0616269	-0.463088	0.704967	-0.0710571	0.187981
AHR	Ccng2	-0.0148255	0.00338558	-0.143777	-0.116005	-0.0890825	0.467385	0.12779	-0.333783
AHR	Cyp1A2	4.18308	-2.60908	-2.17936	0	3.98946	-1.1777	-1.5855	-0.242258
AHR	Fos	-0.406107	-0.44125	0.696117	0	0.177638	-0.136407	0.381003	0.992547
AHR	Il13	0.0315886	-0.181664	-0.0749063	0.032001	0.0463985	-0.040432	-0.084567	-0.0215158
AHR	Il1B	0.324058	-0.0964583	0.531984	-0.00525041	-0.147429	0.0761268	0.167297	-0.0741964
AHR	Mfsd2A	-0.960546	-0.794581	-0.552906	-0.998173	-0.0127785	0.101379	0.169064	0.025433
AHR	Mt2A	1.48313	-1.59627	2.87844	-1.26497	1.21584	-1.11335	1.01886	0.21191
AHR	Myc	-1.11084	-1.53943	0.68469	-0.669561	0.291111	-0.21465	0.598662	0.298609
AHR	Pcna	-0.143334	1.01909	0.488323	0.120159	0.205213	0.771652	0.361605	-0.0420599
AHR	Rfc3	0.0760164	0.635523	0.309612	0.16498	0.23767	0.605809	0.174173	-0.145336
AHR	Ugt1A1	1.25548	1.69789	0.734298	0	1.1742	1.37007	0.225126	1.16008
AHR	Ugt1A6	1.25548	1.69789	0.734298	1.36901	1.1742	1.37007	0.225126	1.16008
AR	Akr1C3	-0.127997	-0.352303	0.0154433	-0.113906	-0.226832	0.958703	0.545068	0.334824
AR	Akt1	-0.330763	0.264311	0.243999	0.117451	0.0473893	0.0141645	0.360414	0.276999
AR	Aldh1A3	-0.199947	-0.578925	-0.290838	0.0373586	-0.168317	-0.0785215	0.032765	-0.116767
AR	Arg1	-0.395094	-0.071132	0.327713	0	0.253938	0.319211	0.104849	0.215896
AR	Arg2	-0.010092	-0.074803	-0.0262545	0.138313	-0.0889828	-0.0440919	0.0269928	0.0744306
AR	Atad2	0.0806682	0.43876	0.326947	0.00769432	0.103884	0.444322	0.109218	-0.124405
AR	Bsg	0.0909119	0.466085	0.287927	0.0528429	0.119344	0.177355	0.21914	-0.0540362
AR	Btg1	-0.130835	-0.369969	-0.342162	-0.241765	-0.0319519	0.0069649	-0.0116012	0.011126
AR	Btg2	-0.0824743	-0.313811	0.104467	-0.292729	-0.278533	0.112128	0.321875	0.0417491
AR	Cdc6	0.164592	0.304909	-0.135604	0.15466	0.170673	0.224482	0.238837	-0.312987
AR	Cdh1	0.130358	-0.584264	-0.514574	-0.56767	0.117872	-0.230675	0.0138619	-0.326722
AR	Cdh11	-0.160021	0.0572305	-0.17297	0.256312	-0.130111	-0.15605	0.112589	-0.0935584
AR	Cdh2	-0.115171	-0.348576	0.0358108	-0.363434	0.117491	-0.562265	-0.0331612	-0.181143
AR	Cdk20	-0.033715	-0.304481	0.0299499	-0.0468082	0.0087202	-0.255578	0.0018304	-0.0913048
AR	Cdk6	0.354364	-0.162291	0.799094	-0.0684704	0.292343	-0.121865	0.629054	0.106426
AR	Cdkn1A	-0.582263	-1.58061	-0.230127	-0.606067	-0.663624	-1.16451	-0.92133	-0.835639
AR	Clk3	-0.0967333	-0.116431	-0.0385186	-0.164946	0.0128018	-0.11371	-0.0227793	-0.128026
AR	Crh	-0.18839	-0.157013	0.0442354	-0.116045	-0.0167407	-0.0993011	0.0538746	-0.0878801
AR	Crisp3	-0.041991	-0.0145876	-0.0194452	-0.0526875	0.0325142	-0.0630383	-0.0265375	0.0378088
AR	Ctnnb1	-0.0180936	0.376523	-0.0510016	-0.246254	0.0017164	0.0791592	0.24213	0.0195004
AR	Cyp7B1	-0.00687425	-0.0688469	0.00114325	0.0876889	-0.2011	0.0242262	-0.00075665	0.0471819
AR	Egfr	-0.211871	0.115825	-0.11772	0.246415	-0.405486	-1.03967	-0.201535	-0.13471
AR	Elk4	-0.0394126	0.13076	0.149523	0.0118113	-0.0454937	-0.0590414	0.119187	0.0350486
AR	Ep300	-0.0578399	-0.0125508	0.151347	-0.0158813	0.0241803	0.0482518	-0.0217572	-0.0549944
AR	Erbb3	0.088498	0.605389	-0.0524602	0.679246	-0.205479	0.450223	-0.138903	0.150327
AR	Etv1	-0.0012972	0.159673	-0.343116	0.0789945	-0.265669	-0.161268	-0.126834	-0.245679
AR	Fkbp4	-0.182923	-0.00746399	-0.108924	-0.206754	-0.0226547	-0.373778	0.265133	-0.0663976
AR	Fn1	-0.295651	-0.777366	-0.615323	-0.831256	-0.350648	-0.316446	-0.169111	-0.451916
AR	Folh1	-0.0669714	-0.0192819	-0.010378	0.101603	-0.157734	0.0769182	0.0420211	0.03872
AR	Foxa1	0.106892	-0.163128	-0.067147	0.0666193	-0.0998058	-0.102458	-0.00841535	0.0145482
AR	Gnmt	-0.283762	-0.13671	-0.206038	0.0903148	-0.276555	-0.311459	-0.163943	-0.00817568
AR	Gtf2F1	0.132671	0.130474	0.275711	0.0478626	0.147288	0.083342	0.0545213	0.033558
AR	Hmmr	-0.0725863	0.943979	0.584442	-0.154075	0.42593	1.73865	-0.0342474	-0.491475
AR	Hmox1	0.470527	-0.392379	0.726385	-0.59694	0.313817	0.330113	0.662878	-0.0623611
AR	Igf1R	0.0855074	0	0	-0.0480242	0.0889984	0	0	0
AR	Igfbp3	-0.726676	-0.665134	-1.9495	-0.269207	-0.494928	-0.233158	-0.74202	-0.797431
AR	Jun	0.0519373	-0.445023	0.0813628	-0.323646	-0.32164	0.100874	-0.2959	0.158535
AR	Kiss1R	0.0760745	-0.177809	-0.139727	-0.00790732	-0.00973146	-0.206383	-0.0846453	-0.0425697
AR	Klf5	0.089936	-0.256259	0.0550621	-0.105798	0.0392975	-0.147503	0.0164715	-0.191662
AR	Klk1	-0.0512479	-0.114955	0.0620253	0.00965137	-0.0495201	-0.0820472	0.0386419	0.0811557
AR	Med1	-0.0835586	0.0726789	-0.0407753	0.0071725	-0.0783362	-0.117866	-0.0663829	-0.0753444
AR	Mid1	-0.227335	0.0530031	0.0658061	0.125078	-0.0911938	0.128837	0.0384343	0.127678
AR	Muc1	0.0395825	-0.398291	-0.0245094	-0.153111	-0.156154	-0.333591	-0.0637311	-0.0273943
AR	Myc	-1.11084	-1.53943	0.68469	-0.669561	0.291111	-0.21465	0.598662	0.298609
AR	Nat1	-0.00364443	0.1105	-0.00839765	0	-0.00686249	0.141752	0.00381063	0.0553815
AR	Ndrg1	-0.0393415	0.247674	-0.141171	0.743582	0.279096	0.00488027	-0.36356	-0.687701
AR	Nfkb1	-0.0985502	0.132027	0.171296	0.08376	0.215089	0.252727	0.19939	0.108358
AR	Nkx3-1	-0.0179199	0.0138806	-0.0145131	0.207494	-0.0370873	0.0738571	-0.0400818	0.14768
AR	Nras	0.253166	0.0978973	0.251271	-0.116938	0.0782476	-0.175217	0.413151	0.116644
AR	Pc	-0.479015	0.299598	-0.328772	-0.57615	-0.124498	-0.353767	-0.056674	-0.393331
AR	Pebp1	0.411091	0.149245	0.62878	-0.127157	0.344929	-0.127506	0.425758	-0.126853
AR	Pigr	-0.20818	-0.00311895	0.270775	0.183239	-0.322217	0.181687	0.0281209	0.362276
AR	Pip	0.0558031	-0.00500609	-0.0706925	0.0017764	0.102359	-0.0360179	0.00395027	0.0105614
AR	Pmepa1	-0.166689	-0.390331	-0.0901648	-0.146447	-0.211125	-0.144157	0.190473	-0.0358002
AR	Pnrc1	0.0150219	-0.230534	0.0290172	0.12716	-0.0150498	0.0439734	0.0133553	-0.0866204
AR	Pten	0.0299644	0.080349	0.105768	-0.0845648	0.0703772	-0.00896987	0.0959434	-0.00964754
AR	Ptgs2	-0.216663	-0.31848	0.857846	0	0.214487	-0.129167	0.345395	0.159986
AR	Rela	0.00931448	0.0996963	0.310016	0	0.116788	0.259325	0.200439	0.160627
AR	Rest	0.00505128	0.0674243	0.0477518	0.11714	-0.0707944	0.0599718	0.00447961	0.0182711
AR	Sesn1	0.200699	-0.0479936	-0.149498	-0.264652	-0.0704392	0.13179	-0.052552	-0.224592
AR	Srd5A3	0.364511	0.0742004	0.707277	0.230268	-0.24018	0.259387	0.545082	-0.146088
AR	Stim1	-0.0874186	-0.350222	-0.166946	-0.176339	-0.141682	-0.331945	-0.0804755	0.00199674
AR	Tbp	0.113457	0.117373	-0.0131339	0.054316	-0.121217	0.0686867	-0.0768855	0.117702
AR	Tcf7L2	0.0230791	-0.170261	-0.0960303	-0.0877145	0.127081	0.0411501	-0.0471379	0.0113365
AR	Tgfa	-0.0878389	0.112919	0.046253	0.172042	0.0695612	0.168325	0.0365688	-0.0180153
AR	Tjp1	-0.127781	0.0521158	-0.0543316	0.210788	0.0509501	0.104101	0.0308246	0.129157
AR	Tmprss2	0.0498054	0.0351929	0.0716859	0.0916411	-0.0393049	-0.0981264	-0.0597207	0.0373202
AR	Trps1	0.150008	0.122916	0.176267	-0.0193172	-0.0184741	-0.149394	0.14306	0.0695083
AR	Tsc1	-0.00917195	0.0238774	0.0635214	-0.07086	0.0240597	0.0640173	-0.0290588	-0.038865
AR	Tsc2	0.00521717	-0.277011	-0.0206012	-0.133246	0.0777707	-0.175256	0.0115025	-0.260001
AR	Ucn	0.0333467	-0.18274	-0.0619566	-0.0388633	0.0593592	-0.142772	-0.124048	0.0164416
AR	Ugt2B15	0.131716	0.00567265	0.395817	0.067122	0.16462	0.220155	0.0218616	-0.030857
AR	Vegfa	-0.16564	0.21058	0.120537	-0.201938	-0.155467	0.0139264	0.0521044	-0.109629
AR	Vim	-0.195465	-0.0405547	1.3618	0	0.100293	0.130192	1.47152	0.104597
AR	Wee1	-0.179361	0.287907	0.189907	-0.105958	0.120686	0.754594	0.193729	-0.037189
AR	Wnt7B	0.0193248	-0.267136	-0.319404	-0.0341434	-0.0745502	-0.264127	-0.135947	-0.179859
AR	Xiap	0.294959	0.00341167	-0.314303	-0.299574	0.307338	0.131254	0.172779	0.290088
ESR1	Abcg2	0.00040723	1.1435	0.630509	0.592096	0.0515321	0.846865	0.254	0.213729
ESR1	Ahr	-0.158695	-0.467452	-0.197881	0	0.228161	0.285948	-0.246037	0.171427
ESR1	Ar	-0.353785	-0.416822	0.0148295	-0.0987367	0.138082	-0.266042	0.0261821	0.0887933
ESR1	Avp	-0.105441	0.0834199	-0.0014135	-0.0834019	0.0097262	-0.222274	-0.0841015	-0.284617
ESR1	Bcl2	-0.069383	0	0.0373695	0.0620387	-0.0348868	0.162712	0.159305	-0.1462
ESR1	Blm	-0.0349394	0.598668	0.0346583	0.086409	-0.0312082	0.639805	-0.0299707	-0.0392794
ESR1	Brca1	0.312708	0.539525	0.581108	0	0.348664	0.906473	-0.075422	-0.39772
ESR1	Btg2	-0.0824743	-0.313811	0.104467	-0.292729	-0.278533	0.112128	0.321875	0.0417491
ESR1	Ccna2	0.099671	2.08985	1.01913	0.142008	0.884029	2.44533	0.587739	-1.15628
ESR1	Ccnd1	-0.63735	0.705762	-0.434003	0.0616269	-0.463088	0.704967	-0.0710571	0.187981
ESR1	Cd24	-0.125373	-0.501857	0.605642	0.0674242	-0.0340532	-0.445595	0.183208	0.338743
ESR1	Cdh1	0.130358	-0.584264	-0.514574	-0.56767	0.117872	-0.230675	0.0138619	-0.326722
ESR1	Cdk4	0.253228	0.645476	0.393557	0.10476	0.287241	0.504137	0.123314	0.192947
ESR1	Cdkn1A	-0.582263	-1.58061	-0.230127	-0.606067	-0.663624	-1.16451	-0.92133	-0.835639
ESR1	Cdkn1B	0.127822	-0.187447	-0.00635229	-0.167646	-0.00933062	-0.106721	0.0484191	0.0497881
ESR1	Cebpb	-0.0811376	0.299944	0.11325	0.128126	0.135247	0.557119	0.204328	0.102438
ESR1	Crh	-0.18839	-0.157013	0.0442354	-0.116045	-0.0167407	-0.0993011	0.0538746	-0.0878801
ESR1	Crhbp	-0.0774555	-0.324554	-0.153696	-0.0865981	-0.0342896	-0.242533	-0.0846569	-0.0405975
ESR1	Ctnnb1	-0.0180936	0.376523	-0.0510016	-0.246254	0.0017164	0.0791592	0.24213	0.0195004
ESR1	Ctsd	0.134786	0.935075	0.774102	0.174786	0.190609	0.539375	0.562265	0.0349619
ESR1	Cxcl12	-0.312024	-0.455609	-0.569475	0.22229	-0.183112	-0.701771	-0.0163509	-0.13845
ESR1	Dct	-0.323435	-0.0789424	-0.29879	-0.0516454	-0.311861	-0.25749	-0.342013	-0.114579
ESR1	E2F1	-0.081028	0.925292	0.39515	-0.0527801	-0.0530055	0.414536	0.382797	-0.198714
ESR1	Egfr	-0.211871	0.115825	-0.11772	0.246415	-0.405486	-1.03967	-0.201535	-0.13471
ESR1	Esr1	-0.244407	-1.49763	-0.281053	-1.2851	-0.792324	-1.05053	-0.136644	-0.350498
ESR1	Esrra	-0.20626	0.189314	-0.148779	0.0463379	-0.0930541	-0.231473	-0.125919	-0.0570394
ESR1	F12	-0.0762091	-0.0658404	0.0793811	0	-0.0319077	-0.20092	-0.0601731	0.0073101
ESR1	Flt1	-0.163231	-0.287908	-0.183257	-0.0998963	-0.187754	-0.095261	-0.129635	0.0148226
ESR1	Fos	-0.406107	-0.44125	0.696117	0	0.177638	-0.136407	0.381003	0.992547
ESR1	Foxp1	-0.222739	-0.201312	-0.150137	-0.149679	-0.11724	-0.0111553	-0.0619201	0.00233136
ESR1	Hspb1	-0.559839	1.59563	0.701404	0.763256	0.0643574	0.468887	0.410776	0.885065
ESR1	Htra2	0.0475679	0.233634	0.121438	0.173068	-0.086808	-0.0262298	0.0274639	0.163396
ESR1	Jak2	-0.0706256	-0.0532994	0.261205	-0.0753318	0.0149688	-0.0835934	0.177698	-0.177324
ESR1	Jun	0.0519373	-0.445023	0.0813628	-0.323646	-0.32164	0.100874	-0.2959	0.158535
ESR1	Junb	-0.0307326	-0.16291	0	-0.106964	0.048861	0	-0.0565096	-0.0496615
ESR1	Kdr	-0.148651	-0.553929	-0.456843	-0.113371	-0.263021	-0.330913	-0.319848	0.067713
ESR1	Krt19	-0.39078	0.25682	0.319039	0.288467	-0.028759	-0.255983	0.121574	0.0138465
ESR1	Mdm2	0.144473	0.334268	0.798113	0.337004	0.18353	0.254	0.340373	0.391597
ESR1	Mmp13	0.159441	-0.0523417	-0.162183	-0.0958583	0.0617555	0.0792338	-0.124252	-0.128358
ESR1	Mta3	-0.0156612	-0.0897546	-0.0868461	-0.0065819	0.0396565	0.0550371	-0.0187051	0.0443479
ESR1	Myc	-1.11084	-1.53943	0.68469	-0.669561	0.291111	-0.21465	0.598662	0.298609
ESR1	Nqo1	1.81614	0.901787	1.60614	0.656936	1.5846	0.872869	0.529637	-0.217291
ESR1	Nr5A2	-0.0724139	-0.474933	-0.151919	-0.404451	0.101043	-0.22791	0.00401256	0.080064
ESR1	Nrf1	-0.0601965	-0.0264456	-0.136835	-0.0121547	-0.0680856	-0.17621	-0.241385	-0.00796824
ESR1	Oxt	-0.207087	0.141569	0.126629	-0.0840374	0.128303	0.153439	0.113808	-0.135209
ESR1	Pelp1	0.0390868	-0.0285788	-0.0702653	-0.00580197	-0.0103735	-0.0446413	-0.0216008	-0.0921398
ESR1	Plac1	0.0396562	0.0102414	-0.00623038	0.131189	-0.0468362	-0.0183993	-0.136875	0.0230898
ESR1	Ptma	-0.148975	0.0142584	0.294889	0.0297811	0.299695	0.265952	0.389502	0.167243
ESR1	Rara	0.111047	-0.340425	-0.148185	-0.159761	-0.029432	-0.244804	-0.067149	-0.0642584
ESR1	Ret	-0.0794855	0	0.00636044	-0.0187747	0	0	0	0
ESR1	Serpinb9	0.0950501	0.108215	0.427015	-0.210225	0.197268	-0.0806012	0.450979	0.286778
ESR1	Sp1	0.0618691	0.0728586	0.112436	0.0609874	-0.08606	0.0930807	0.00284216	0.0566914
ESR1	Tac3	0.0420958	-0.38628	-0.350449	-0.132744	-0.0218333	-0.490324	-0.333444	-0.274983
ESR1	Tert	-0.110484	-0.412413	0.0769657	0.126406	-0.0792429	-0.220243	0.0525104	0.197787
ESR1	Tgfa	-0.0878389	0.112919	0.046253	0.172042	0.0695612	0.168325	0.0365688	-0.0180153
ESR1	Tp53	-0.0881645	0.562074	0.340748	0.157138	-0.0541469	0.291151	0.135251	-0.0344553
ESR1	Tyms	0.0637122	1.0896	0.181575	0	0.230397	0.821895	0.246155	0.098387
ESR1	Ugt2B15	0.131716	0.00567265	0.395817	0.067122	0.16462	0.220155	0.0218616	-0.030857
ESR1	Vegfa	-0.16564	0.21058	0.120537	-0.201938	-0.155467	0.0139264	0.0521044	-0.109629
ESR1	Ywhaq	0.0519868	0.247514	0.330968	0.0248427	0.0405661	0.275629	0.303861	0.0619243
ESR1	Zeb1	-0.218047	-0.179194	-0.0517477	-0.198784	-0.193601	-0.113727	0.0072031	0.127597
ESR1	Zfhx3	-0.0066267	-0.360178	-0.250813	-0.408089	0.134765	-0.149003	-0.155137	-0.165845
ESR2	Avp	-0.105441	0.0834199	-0.0014135	-0.0834019	0.0097262	-0.222274	-0.0841015	-0.284617
ESR2	Brca2	0.048951	-0.0770788	0.109552	-0.280031	0.162387	-0.120347	-0.0123161	-0.238082
ESR2	Cd68	-0.172376	-0.65401	0.294946	0	-0.215901	-0.0415801	0.599358	-0.07785
ESR2	Cdkn1A	-0.582263	-1.58061	-0.230127	-0.606067	-0.663624	-1.16451	-0.92133	-0.835639
ESR2	Crh	-0.18839	-0.157013	0.0442354	-0.116045	-0.0167407	-0.0993011	0.0538746	-0.0878801
ESR2	Ctsd	0.134786	0.935075	0.774102	0.174786	0.190609	0.539375	0.562265	0.0349619
ESR2	Fos	-0.406107	-0.44125	0.696117	0	0.177638	-0.136407	0.381003	0.992547
ESR2	Insr	0.0331371	-0.149627	0.0820207	-0.0263941	0.0582945	-0.0704212	-0.0516183	0.00180948
ESR2	Jun	0.0519373	-0.445023	0.0813628	-0.323646	-0.32164	0.100874	-0.2959	0.158535
ESR2	Mknk2	-0.129294	0.369952	-0.01968	-0.441981	0.0797308	0.556499	0.367125	-0.0732662
ESR2	Oxt	-0.207087	0.141569	0.126629	-0.0840374	0.128303	0.153439	0.113808	-0.135209
ESR2	Pelp1	0.0390868	-0.0285788	-0.0702653	-0.00580197	-0.0103735	-0.0446413	-0.0216008	-0.0921398
ESR2	Ptprc	-0.0156772	-0.176876	-0.0425355	0	0.12535	-0.311992	0.0134423	-0.0348437
ESR2	Tert	-0.110484	-0.412413	0.0769657	0.126406	-0.0792429	-0.220243	0.0525104	0.197787
ESR2	Tgfa	-0.0878389	0.112919	0.046253	0.172042	0.0695612	0.168325	0.0365688	-0.0180153
ESR2	Vegfa	-0.16564	0.21058	0.120537	-0.201938	-0.155467	0.0139264	0.0521044	-0.109629
HNF4A	Abcc6	0.0123069	-0.139648	-0.19022	-0.147452	-0.288154	0.152339	0.112921	-0.32852
HNF4A	Abcg5	-1.10559	-2.96907	-0.379327	0	-0.834773	-2.47485	-0.893182	-1.34027
HNF4A	Acat2	-0.221557	-0.490016	-0.0940944	-0.715229	0.315396	0.54033	0.357608	-0.372652
HNF4A	Afp	0.00655513	0.299759	-0.209307	-0.10466	0.115811	-0.0215854	0.0219086	-0.0244575
HNF4A	Apoa1	-0.797379	-1.38457	-1.21797	-1.99691	0.228912	0.218788	-0.829659	-1.34328
HNF4A	Apoa2	0.156135	-0.502585	0.303535	0	0.362477	0.637483	0.16104	0.787644
HNF4A	Apob	-0.036187	-0.156093	-0.0844555	-0.137084	-0.00852947	0.0085511	-0.162335	-0.0275686
HNF4A	Apoc3	-0.287793	-1.26435	-0.110213	-0.220156	-0.449545	-0.791539	0.301365	-0.120878
HNF4A	C1Qtnf5	-0.173637	-0.30166	-0.0339057	-0.209296	-0.0787213	-0.189616	0.174379	-0.147639
HNF4A	Cdkn1A	-0.582263	-1.58061	-0.230127	-0.606067	-0.663624	-1.16451	-0.92133	-0.835639
HNF4A	Ceacam1	-0.253403	-0.609962	-0.371297	-0.233974	0.0592608	-0.399432	-0.139935	0.00387737
HNF4A	Cyp27A1	0.00833584	-0.226408	-0.3125	-0.42021	0.0600561	-0.303009	-0.304432	-0.0431214
HNF4A	Cyp7A1	-0.253021	-0.157426	-0.746294	-2.18914	1.0599	0.375985	1.03275	0.901042
HNF4A	Fabp2	0.654568	0.26375	0.905324	0.490894	0.793182	1.50877	-0.247028	0.455016
HNF4A	Gck	-0.315383	0.27957	-0.130089	-0.917087	-0.0646576	-0.118363	-0.403918	0.536134
HNF4A	Gfer	-0.0571637	0.297703	0.0158763	0.391994	-0.0161385	0.0858409	-0.0692327	0.198912
HNF4A	Gh1	0.00202757	-0.013479	0.0481573	0.0200445	0.126893	0.256171	0.044802	0.0497181
HNF4A	Hnf1A	-0.0861877	0.0624145	-0.155433	-0.151625	-0.174635	-0.186887	0.0623662	0.0346698
HNF4A	Kcnj11	-0.0686291	-0.182028	-0.171063	-0.0789188	-0.0646837	-0.150187	-0.146695	-0.0896938
HNF4A	Ldlr	0.427422	0.537758	-0.0195348	0	-0.176823	0.283312	0.31342	0.0222241
HNF4A	Lipc	-0.395521	-0.39831	-0.448588	-0.2751	-0.334074	0.00676903	-0.211236	0.0499883
HNF4A	Mmp7	-0.139046	-0.133408	-0.0500299	0.0339351	-0.0564993	-0.179185	-0.0201847	0.0115107
HNF4A	Mttp	-0.117834	1.11036	0.420254	0.593032	0.0129581	0.957678	0.0959782	0.274061
HNF4A	Myc	-1.11084	-1.53943	0.68469	-0.669561	0.291111	-0.21465	0.598662	0.298609
HNF4A	Nr1I2	-0.153373	0.413053	0.107857	-0.176108	-0.0104233	0.0214131	0.153304	0.202991
HNF4A	Pcsk9	0.120487	-0.448861	-0.462812	-0.697727	0.356172	0.078547	0.0317753	-0.287728
HNF4A	Ppara	-0.121791	0.357839	0.173224	0	0.128242	-0.0982657	0.267767	0.159978
HNF4A	Rnase2	0.0941875	0.162556	0.283785	0.186952	0.187816	0.294894	0.265513	0.217879
HNF4A	Serpinc1	0.068838	-0.0972735	-0.0703996	-0.236958	-0.0254101	-0.232435	-0.00236745	-0.0619377
HNF4A	Shbg	0.204615	0.0087143	-0.162452	0.0609988	0.108496	0.0399616	-0.116144	-0.00648962
HNF4A	Slc26A3	-0.116955	-0.021638	-0.0712782	0.024204	0.101656	0	0.00821624	0.0857269
HNF4A	Tbp	0.113457	0.117373	-0.0131339	0.054316	-0.121217	0.0686867	-0.0768855	0.117702
HNF4A	Tcf7L2	0.0230791	-0.170261	-0.0960303	-0.0877145	0.127081	0.0411501	-0.0471379	0.0113365
HNF4A	Ugt2B7	0.0826943	-0.839051	0.633543	-0.200128	0.212765	0.100836	0.0818962	0.205563
NFE2	Gclc	-0.0409619	-0.440543	0.804544	-0.147143	0.815869	0.484844	0.733217	0.48176
NFE2	Gss	0.0490236	0.473767	0.503057	-0.153329	0.299686	0.17285	0.431167	0.160796
NFE2	Hbe1	0.0991763	-0.216273	-0.102534	-0.00469769	-0.0590787	-0.144438	-0.184644	-0.262098
NFE2	Tbxa2R	-0.11992	-0.195032	0.0214854	-0.0775402	0.108178	0.126747	0.204712	0.260608
NR1H2	Abca1	-0.0271326	0.309615	-0.317415	-0.133733	-0.103041	0.407589	-0.324852	-0.230625
NR1H2	Abcg1	-0.0235321	0.273557	-0.0579889	0.176563	-0.101656	0.308309	0.00079851	-0.00622704
NR1H2	Abcg4	-0.102584	-0.0642353	-0.152286	-0.00892648	-0.10994	-0.102619	-0.0498678	-0.0268606
NR1H3	Abca1	-0.0271326	0.309615	-0.317415	-0.133733	-0.103041	0.407589	-0.324852	-0.230625
NR1H3	Abcg1	-0.0235321	0.273557	-0.0579889	0.176563	-0.101656	0.308309	0.00079851	-0.00622704
NR1H3	Abcg4	-0.102584	-0.0642353	-0.152286	-0.00892648	-0.10994	-0.102619	-0.0498678	-0.0268606
NR1H3	Bhlhe40	-0.184585	-0.179637	-0.459163	-0.653301	-0.712971	0.173039	-0.267737	-0.756552
NR1H4	Abcb11	-0.31443	0.376548	0.0537312	0.366185	-0.292948	0.155305	-0.0731268	0.179213
NR1H4	Abcb4	-0.0483706	-0.638499	0.277891	-0.633606	0.0293352	-0.469841	0.0362755	-0.250646
NR1H4	Abcc4	-0.206698	0.0531862	0.633792	-0.0832614	0.19479	0.306182	0.526532	0.000320545
NR1H4	Cyp7A1	-0.253021	-0.157426	-0.746294	-2.18914	1.0599	0.375985	1.03275	0.901042
NR1H4	Dcn	-0.3321	0.210351	-0.181948	-0.219378	-0.0323266	-0.0741489	0.239152	0.196045
NR1H4	Edn1	0.0393931	0.134938	0.825186	0	-0.286378	0.254379	0.192986	0.310247
NR1H4	Fabp6	-0.0243396	-0.34026	-0.0831617	-0.208379	-0.104447	-0.519707	-0.00689551	-0.300703
NR1H4	Hsd3B2	-0.198402	0.370213	0.0352708	0.217232	-0.17345	0.250166	0.0159223	-0.0854975
NR1H4	Klf11	-0.104337	0.877057	0.150064	0.427426	-0.163617	0.64233	0.0707803	0.129764
NR1H4	Krt13	0.135052	-0.509723	-0.193662	-0.037834	-0.0829147	-0.443545	-0.0289007	-0.293734
NR1H4	Nfkb1	-0.0985502	0.132027	0.171296	0.08376	0.215089	0.252727	0.19939	0.108358
NR1H4	Nr1I2	-0.153373	0.413053	0.107857	-0.176108	-0.0104233	0.0214131	0.153304	0.202991
NR1H4	Pltp	-0.0687653	-0.674319	-0.26036	-0.410261	-0.214041	-0.959222	0.183896	-0.593027
NR1H4	Rela	0.00931448	0.0996963	0.310016	0	0.116788	0.259325	0.200439	0.160627
NR1H4	Scarb1	0.18459	-0.419918	-0.0443963	-0.117642	0.233222	-0.346733	0.20377	-0.151585
NR1H4	Stk11	-0.0575216	-0.218569	-0.197685	-0.0228553	0.0826998	0.00890586	-0.0760975	0.034817
NR1H4	Vegfa	-0.16564	0.21058	0.120537	-0.201938	-0.155467	0.0139264	0.0521044	-0.109629
NR1I2	Bcl2	-0.069383	0	0.0373695	0.0620387	-0.0348868	0.162712	0.159305	-0.1462
NR1I2	Bcl2L1	-0.165172	-0.176166	-0.0512535	-0.140142	-0.0465519	-0.125897	0.0965972	-0.0612968
NR1I2	Ccl2	0.117917	0.380573	1.3649	0	0.0225547	0.193153	0.872609	0.00475276
NR1I2	Coro1C	-0.149963	0.275635	0.391018	0.0246059	-0.0642959	0.336714	0.418162	0.195315
NR1I2	Fgf19	0.0253117	-0.0109085	-0.0920813	-0.0676809	-0.00881711	-0.120232	-0.0646233	-0.111187
NR1I2	Hp	0.153178	-0.737216	-0.423197	-0.708074	-0.14943	-0.516891	0.15822	-0.449884
NR1I2	Il10	0.0456158	-0.127728	0.00571957	0.291642	0.035455	0.0965138	-0.135545	-0.0421468
NR1I2	Klf6	-0.0269797	-0.345066	0.759815	-0.654475	0.0916628	-0.0749745	0.217162	0.236795
NR1I2	Nfkb1	-0.0985502	0.132027	0.171296	0.08376	0.215089	0.252727	0.19939	0.108358
NR1I2	Nod1	-0.0987012	-0.232653	0.0848328	-0.311935	-0.220775	-0.0306624	0.112001	-0.180284
NR1I2	Ptafr	-0.010011	-0.0752188	0.0308542	0.00901179	-0.0154036	0.11997	0.0832999	-0.00927339
NR1I2	Rab3A	-0.00024948	-0.28566	-0.33999	-0.223828	0.0237555	-0.31866	-0.229815	-0.152212
NR1I2	Rela	0.00931448	0.0996963	0.310016	0	0.116788	0.259325	0.200439	0.160627
NR1I2	Rxra	0.0999715	0.307595	0.0354683	0	0.0457804	0.129818	0.327191	0.24682
NR1I2	Thrsp	-0.240847	0.954287	0.0029438	-1.50914	0.481101	2.09929	0.460195	0.250405
NR1I2	Tnfrsf12A	-0.0276108	0	0.24721	0	0	0	0	0
NR1I2	Ugt1A1	1.25548	1.69789	0.734298	0	1.1742	1.37007	0.225126	1.16008
NR1I3	Ugt1A1	1.25548	1.69789	0.734298	0	1.1742	1.37007	0.225126	1.16008
NR3C1	Atf2	0.00348049	-0.222091	-0.236368	-0.0873483	-0.0580221	-0.0865349	-0.203959	0.0736467
NR3C1	Atp1B1	-0.578105	0.430517	-0.131197	-0.549447	0.205236	0.775609	0.184584	0.341287
NR3C1	Bad	-0.085599	-0.136502	-0.0147875	0.0493451	0.0355812	0.198261	0.171415	0.00242969
NR3C1	Bax	-0.133349	0.287082	0.22169	0	0.170453	0.220709	0.2576	-0.0702766
NR3C1	Bglap	0.115766	-0.356052	-0.0206931	0.00989269	0.0620395	-0.0233159	-0.0279236	-0.0361172
NR3C1	Brca1	0.312708	0.539525	0.581108	0	0.348664	0.906473	-0.075422	-0.39772
NR3C1	Cald1	0.123247	0.193899	0.274623	-0.198871	0.157665	0.0842009	0.558444	0.217412
NR3C1	Ccnd1	-0.63735	0.705762	-0.434003	0.0616269	-0.463088	0.704967	-0.0710571	0.187981
NR3C1	Ccnd3	0.198735	0.0331677	0.00042305	0	0.10797	0.0715215	0.199199	-0.0450113
NR3C1	Cdk4	0.253228	0.645476	0.393557	0.10476	0.287241	0.504137	0.123314	0.192947
NR3C1	Cdk6	0.354364	-0.162291	0.799094	-0.0684704	0.292343	-0.121865	0.629054	0.106426
NR3C1	Cdkn1A	-0.582263	-1.58061	-0.230127	-0.606067	-0.663624	-1.16451	-0.92133	-0.835639
NR3C1	Csf1R	0.0112138	-0.819178	0.202596	-0.241625	-0.193723	-0.212455	0.202579	-0.234805
NR3C1	Elk1	0.0503927	-0.142419	-0.0940164	-0.107255	-0.0456832	-0.185676	-0.0718484	-0.00139876
NR3C1	Ets1	-0.358732	-0.435706	-0.382694	0	-0.25561	0.0551739	0.225115	-0.169707
NR3C1	Hrh1	0.00407385	-0.0971829	-0.0631229	-0.040966	0.0233651	-0.067487	-0.0500913	-0.0189991
NR3C1	Hsd11B2	-0.315189	-0.184419	-0.188281	-0.0290186	-0.226138	-0.462785	0.248956	-0.335193
NR3C1	Maoa	0.428858	0.687153	0.607196	0.345367	0.12031	0.394025	0.254822	0.228375
NR3C1	Muc4	-0.0878456	-0.0136937	-0.157579	0.0194127	-0.254734	-0.0573597	-0.124529	0.00892466
NR3C1	Nfkb1	-0.0985502	0.132027	0.171296	0.08376	0.215089	0.252727	0.19939	0.108358
NR3C1	Nr1I2	-0.153373	0.413053	0.107857	-0.176108	-0.0104233	0.0214131	0.153304	0.202991
NR3C1	Nr3C1	-0.280879	-0.574992	-0.263559	0	-0.335497	-0.221752	0.0311241	-0.143608
NR3C1	Pnrc1	0.0150219	-0.230534	0.0290172	0.12716	-0.0150498	0.0439734	0.0133553	-0.0866204
NR3C1	Ppig	0.0553012	0.0493561	-0.0527965	0.0342304	-0.0784408	-0.0586366	-0.157844	0.00873859
NR3C1	Rln1	-0.0308682	-0.327049	-0.0866972	0.139762	-0.0154688	-0.0870582	-0.0975132	0.0432674
NR3C1	Rps6Ka3	-0.0244448	-0.102251	0.22202	-0.209008	0.00772973	0.0285846	0.266459	0.0136505
NR3C1	Scnn1A	0.0485962	0.170663	0.0495954	0.270815	0.203251	0.215379	-0.0170958	0.217668
NR3C1	Slc10A2	-0.367074	-0.527771	-0.103503	-0.675556	0	0	0	0
NR3C1	Spp1	0.0489634	-0.0757021	0.855561	0.478963	0.216511	0.184513	0.412213	-0.476419
NR3C1	Srf	-0.0046959	-0.0105173	0.0493714	0.0965872	-0.109345	-0.0184724	0.0125236	0.00926554
NR3C1	Stat1	0.146948	0.327921	0.328723	0.111987	-0.167612	0.675335	0.24217	-0.00043982
NR3C1	Tat	-0.754093	-0.210367	-0.646332	-0.985802	0.569486	0.520579	0.225151	0.00883839
NR3C1	Tp53	-0.0881645	0.562074	0.340748	0.157138	-0.0541469	0.291151	0.135251	-0.0344553
NR3C1	Ugt1A1	1.25548	1.69789	0.734298	0	1.1742	1.37007	0.225126	1.16008
PPARA	Acadl	0.0500886	1.88317	0.480896	0.916267	0.248451	1.42205	0.463413	0.50392
PPARA	Acox1	-0.0487542	4.05492	0.63784	2.57853	-0.128475	2.85993	0.398963	0.653871
PPARA	Acsl1	-0.36331	1.18966	0.279548	0.762605	-0.0843487	1.16785	0.37112	0.362576
PPARA	Angptl4	-0.170007	2.74589	0.422091	2.33605	-0.631334	1.70301	0.236711	0.930522
PPARA	Apoa4	-0.606038	-3.08368	-0.998699	-1.51601	-0.17053	-1.4189	-0.582008	-0.585848
PPARA	Apoa5	-0.191211	-1.46262	-0.561874	-1.12372	-0.222997	-0.938344	-0.317633	-0.455439
PPARA	Apob	-0.036187	-0.156093	-0.0844555	-0.137084	-0.00852947	0.0085511	-0.162335	-0.0275686
PPARA	Apobr	0.102962	-0.251966	-0.202595	0.131305	-0.172571	-0.294491	-0.272472	-0.018086
PPARA	Apoc3	-0.287793	-1.26435	-0.110213	-0.220156	-0.449545	-0.791539	0.301365	-0.120878
PPARA	Cd36	0.415397	3.90219	0.736718	0	0.136215	1.06955	0.329172	0.335369
PPARA	Cpt1A	0.0306778	1.75485	0.387713	1.01881	0.211715	1.37934	0.379979	0.434735
PPARA	G0S2	0.880694	2.16406	0.505295	1.19234	-0.574877	-0.420944	-0.349736	0.330367
PPARA	Hmox1	0.470527	-0.392379	0.726385	-0.59694	0.313817	0.330113	0.662878	-0.0623611
PPARA	Igfbp1	-1.45258	-1.76213	-0.0935767	-1.98412	0.560631	0.968374	0.479965	1.02285
PPARA	Il6R	-0.201134	-1.21679	-0.717392	-1.1424	0.0118474	-0.781151	-0.303778	-0.357496
PPARA	Lpl	-0.757216	2.43853	0.375182	0.64099	-0.73078	-0.559909	0.165871	-0.0165027
PPARA	Mlycd	-0.0855132	1.34457	0.0740931	0.947603	0.0115097	0.898126	0.117516	0.372072
PPARA	Mmp9	-0.0353904	0.0933284	0.637193	0.0311107	0.155313	-0.0780204	0.430082	-0.153341
PPARA	Nfkbia	-0.421464	-0.359585	-0.454274	-0.735012	1.5445e-05	0.0519402	0.446275	0.243627
PPARA	Pdk4	-0.345261	4.00469	0.661181	2.91479	-0.640722	2.9058	0.23301	1.12251
PPARA	Plin2	-0.201835	2.746	0.153687	1.16975	-0.294672	1.40303	0.0788011	0.499973
PPARA	Ptgs2	-0.216663	-0.31848	0.857846	0	0.214487	-0.129167	0.345395	0.159986
PPARA	Slc25A20	0.0344523	2.35577	0.716834	1.29684	0.223558	1.72304	0.52638	0.597556
PPARA	Slc9A1	-0.0114234	-0.101396	0.00783189	-0.0162733	0.0217795	-0.0970739	0.0176422	-0.0315067
PPARA	Sod2	0.173197	0.594423	0.490373	0.417217	0.17085	0.270531	0.41079	-0.0502733
PPARA	Srebf2	-0.0375445	-0.324913	-0.0789266	-0.126958	-0.00548476	-0.187877	0.00023865	-0.100431
PPARA	Stat5A	0.0271518	-0.179612	0.109001	-0.101806	0.0377347	-0.114797	0.102912	0.0254288
PPARA	Sult2A1	0.253934	-0.890225	-0.026763	-1.04954	0.384882	-0.524623	-0.443652	0.301996
PPARA	Tuba1B	0.0379787	0.561427	0.377691	0.383711	0.347521	0.658911	0.334233	0.233887
PPARA	Txnip	-0.120808	0.717026	-0.031675	0.246371	-0.275185	0.436956	0.0598342	0.177938
PPARA	Ugt1A9	1.25548	1.69789	0.734298	1.36901	1.1742	1.37007	0.225126	1.16008
PPARG	Abcg2	0.00040723	1.1435	0.630509	0.592096	0.0515321	0.846865	0.254	0.213729
PPARG	Acat1	-0.087914	2.2931	0.540427	1.49036	0.0774562	1.66022	0.3283	0.569487
PPARG	Ager	0.164706	-0.217719	-0.135899	0.00767672	0.0658402	0.0791313	-0.0682727	-0.0762025
PPARG	Angptl4	-0.170007	2.74589	0.422091	2.33605	-0.631334	1.70301	0.236711	0.930522
PPARG	Apob	-0.036187	-0.156093	-0.0844555	-0.137084	-0.00852947	0.0085511	-0.162335	-0.0275686
PPARG	Apobr	0.102962	-0.251966	-0.202595	0.131305	-0.172571	-0.294491	-0.272472	-0.018086
PPARG	Atp2A2	-0.0823801	-0.12752	0.0453356	-0.132111	-0.0108648	-0.0973138	0.0876043	0.0404011
PPARG	Bad	-0.085599	-0.136502	-0.0147875	0.0493451	0.0355812	0.198261	0.171415	0.00242969
PPARG	Bcl2	-0.069383	0	0.0373695	0.0620387	-0.0348868	0.162712	0.159305	-0.1462
PPARG	Bcl2L1	-0.165172	-0.176166	-0.0512535	-0.140142	-0.0465519	-0.125897	0.0965972	-0.0612968
PPARG	Cat	0.0688425	0.50963	0.565297	0	0.267217	0.637062	0.249322	0.0932173
PPARG	Cav1	-0.0923444	0.266163	0.465203	-0.324612	0.226562	-0.0359248	0.662988	0.392391
PPARG	Ccnd1	-0.63735	0.705762	-0.434003	0.0616269	-0.463088	0.704967	-0.0710571	0.187981
PPARG	Ccne1	-0.00330564	0.70738	0.299882	0.140034	0.25919	0.610914	0.299119	0.026422
PPARG	Cd36	0.415397	3.90219	0.736718	0	0.136215	1.06955	0.329172	0.335369
PPARG	Cd83	0.0657094	-0.545798	0.933531	-0.0514562	0.29856	-0.237423	0.779907	-0.388447
PPARG	Cdkn1A	-0.582263	-1.58061	-0.230127	-0.606067	-0.663624	-1.16451	-0.92133	-0.835639
PPARG	Cebpa	0.163412	0.374132	0.154338	-0.0882583	-0.127145	0.394484	0.083095	0.173125
PPARG	Cflar	-0.343027	-0.0362249	-0.302525	-0.0593681	0.0302916	0.149526	-0.0311046	0.197152
PPARG	Ciita	0.0168856	-0.466552	-0.113601	-0.154515	-0.0813984	-0.289985	-0.0354597	-0.236439
PPARG	Cldn2	-0.0838759	-0.875035	-0.328521	-0.49784	0.00312708	-0.498143	-0.157533	-0.0383601
PPARG	Cpt1B	0.290954	4.69328	-0.0319659	0.994745	-0.307689	2.30022	0.0664217	-0.408901
PPARG	Csf1	0.0516951	-0.259332	-0.105946	-0.105081	-0.0216943	0.0140518	0.0352003	0.00614709
PPARG	Dbi	0.0169716	0.571728	0.0613502	0.282375	0.0732363	0.46696	0.122612	0.0367831
PPARG	Egfr	-0.211871	0.115825	-0.11772	0.246415	-0.405486	-1.03967	-0.201535	-0.13471
PPARG	Ero1A	-0.129188	0.0166313	0.347368	0.0919825	0.303283	0.101213	0.0225278	0.311581
PPARG	Erp44	0.0142984	-0.11075	0.0792852	-0.0040031	0.0186332	-0.0174949	0.112683	0.0084322
PPARG	Fgf1	-0.238815	-0.474307	-0.0562134	-0.291745	0.626023	0.621678	0.669661	0.0528988
PPARG	Gdf15	0.205107	0.758562	1.3595	0.642117	0.74257	2.53156	0.907034	2.32627
PPARG	Gk	-0.424555	0.756275	0.162923	0.498818	-0.161818	0.417387	0.0329688	0.305089
PPARG	Hmox1	0.470527	-0.392379	0.726385	-0.59694	0.313817	0.330113	0.662878	-0.0623611
PPARG	Icam1	0.444223	0.383903	0.862359	0.558915	0.0818417	0.618064	0.681844	0.295362
PPARG	Jag1	-0.121267	-0.578937	0.0965733	0.0906817	-0.518396	-0.396867	0.237001	-0.33046
PPARG	Klf4	-0.0638944	-0.0710134	0.0514917	-0.213365	-0.207623	0.117221	0.296397	-0.0128947
PPARG	Lipe	-0.0316296	0.0793694	-0.203494	-0.0355276	-0.0302066	0.138536	-0.0706587	-0.0906976
PPARG	Mmp9	-0.0353904	0.0933284	0.637193	0.0311107	0.155313	-0.0780204	0.430082	-0.153341
PPARG	Myc	-1.11084	-1.53943	0.68469	-0.669561	0.291111	-0.21465	0.598662	0.298609
PPARG	Notch4	0.149919	-0.15923	0.0746052	0	0.246079	0.133741	-0.0344943	0.180297
PPARG	Nr1H3	0.241171	0.510967	-0.0561813	0.398399	0.270556	0.621676	0.349847	0.463911
PPARG	Pdk2	-0.218088	0.784903	0.0134499	0.0935973	0.0793047	0.504112	0.595168	0.38711
PPARG	Plin2	-0.201835	2.746	0.153687	1.16975	-0.294672	1.40303	0.0788011	0.499973
PPARG	Pou2F1	-0.032962	0.111092	0.0234643	0.0234747	-0.20229	-0.0283949	-0.176472	0.0447587
PPARG	Pten	0.0299644	0.080349	0.105768	-0.0845648	0.0703772	-0.00896987	0.0959434	-0.00964754
PPARG	Ptgs2	-0.216663	-0.31848	0.857846	0	0.214487	-0.129167	0.345395	0.159986
PPARG	Rarb	-0.189733	-0.707018	-0.361085	-0.625268	-0.0499289	-0.150106	-0.177997	0.0769728
PPARG	Ren	0.0783647	-0.0668704	0.0981836	-0.11537	-0.00773741	0.100941	0.0210101	0.188266
PPARG	Retn	0.0270519	-0.230589	-0.0576197	-0.436001	0.1007	-0.250616	0.0861795	-0.145824
PPARG	Sat1	-0.12987	-0.244252	-0.263312	0	-0.246894	0.102942	-0.34887	-0.0583972
PPARG	Slc2A4	0.120573	-0.0312853	0.0244586	-0.269504	0.131114	-0.0734232	0.117541	0.0395789
PPARG	Slc9A1	-0.0114234	-0.101396	0.00783189	-0.0162733	0.0217795	-0.0970739	0.0176422	-0.0315067
PPARG	Socs7	-0.0821733	-0.117551	-0.0334558	-0.127295	-0.0723961	-0.122511	-0.0330016	-0.0683417
PPARG	Tg	0.12744	0	-0.0638523	-0.0248712	0.0823898	-0.201076	0	-0.0204088
PPARG	Tnfrsf11B	-0.325081	-0.271651	0.0257516	-0.141222	-0.334237	-0.178301	0.27566	0.0051273
PPARG	Tp53	-0.0881645	0.562074	0.340748	0.157138	-0.0541469	0.291151	0.135251	-0.0344553
PPARG	Tshr	0.0262831	-0.0893989	-0.103551	-0.211543	-0.0276204	-0.16891	0.0543004	0.0907126
PPARG	Txnip	-0.120808	0.717026	-0.031675	0.246371	-0.275185	0.436956	0.0598342	0.177938
PPARG	Ugt1A9	1.25548	1.69789	0.734298	1.36901	1.1742	1.37007	0.225126	1.16008
PPARG	Vldlr	-0.0148553	1.48184	0.0620155	0.0496674	0.00414809	0	0.150945	-0.0146005
RARA	Abcc3	1.75229	2.97434	3.39686	1.6032	1.65656	1.46309	1.81934	0.998568
RARA	Anxa8	-0.0453854	-0.391674	-0.467204	-0.157232	-0.127526	-0.213304	-0.496444	-0.199548
RARA	Cdkn1A	-0.582263	-1.58061	-0.230127	-0.606067	-0.663624	-1.16451	-0.92133	-0.835639
RARA	Crabp1	-0.141216	-0.132395	-0.255717	-0.0190356	-0.231134	-0.38302	-0.170308	-0.244689
RARA	Crh	-0.18839	-0.157013	0.0442354	-0.116045	-0.0167407	-0.0993011	0.0538746	-0.0878801
RARA	Cxcr5	0.0130424	-0.0816145	-0.0556579	0.0108143	-0.0686042	0.0429212	-0.0526327	0.00655754
RARA	Ets1	-0.358732	-0.435706	-0.382694	0	-0.25561	0.0551739	0.225115	-0.169707
RARA	Fgfbp1	-0.0561634	-0.262541	-0.0270974	0.211262	-0.248567	-0.0751054	-0.0586816	0.0279192
RARA	Hck	0.00832775	-0.130156	-0.0312649	-0.129377	-0.187802	-0.199121	0.305909	-0.160044
RARA	Hnf4A	0.0647945	-0.21793	-0.11182	-0.106202	0.0486229	-0.476356	0.0344495	0.0177751
RARA	Icam1	0.444223	0.383903	0.862359	0.558915	0.0818417	0.618064	0.681844	0.295362
RARA	Macrod1	0.128319	0.168519	0.408597	0.363258	0.064922	0.161624	0.318458	0.227651
RARA	Maob	-0.0692095	-0.433523	0.1087	-0.105179	-0.166754	-0.0217242	0.122314	0.175469
RARA	Muc5Ac	0.0054889	-0.403106	-0.182636	-0.224065	-0.155501	-0.332589	-0.0939118	-0.00909485
RARA	Nr1I3	-0.320508	0.541054	0.364789	0.33515	0.2983	1.29206	0.414406	1.04583
RARA	Plau	-0.0384341	-0.478202	0.418776	-0.423233	-0.122553	0.200762	0.528402	-0.123844
RARA	Prkca	0.0535277	-0.325571	0.179829	-0.37487	0.0392853	-0.400511	-0.0455035	-0.0461261
RARA	Rarb	-0.189733	-0.707018	-0.361085	-0.625268	-0.0499289	-0.150106	-0.177997	0.0769728
RARA	Rptor	-0.04997	0.211549	0.111465	0.101767	0.0951143	0.057116	0.0293696	-0.0258452
RARA	Scd	-1.38066	3.56803	0.22782	1.16145	-0.794286	3.64081	0.644312	0.865888
RARA	Sftpb	0.209514	-0.210711	-0.00471703	0.108708	0.0165255	-0.0809175	-0.00771798	0.0730888
RARA	Thbd	-0.187595	-0.0258207	0.0484212	-0.153749	0.118769	-0.121532	0.559658	0.214972
RARB	Adh5	0.125814	0.880847	0.652675	0.394785	0.058887	0.319796	0.191018	0.161074
RARB	Rarb	-0.189733	-0.707018	-0.361085	-0.625268	-0.0499289	-0.150106	-0.177997	0.0769728
RARB	Thbd	-0.187595	-0.0258207	0.0484212	-0.153749	0.118769	-0.121532	0.559658	0.214972
RARG	Bglap	0.115766	-0.356052	-0.0206931	0.00989269	0.0620395	-0.0233159	-0.0279236	-0.0361172
RARG	Icam1	0.444223	0.383903	0.862359	0.558915	0.0818417	0.618064	0.681844	0.295362
RARG	Rarb	-0.189733	-0.707018	-0.361085	-0.625268	-0.0499289	-0.150106	-0.177997	0.0769728
RARG	Thbd	-0.187595	-0.0258207	0.0484212	-0.153749	0.118769	-0.121532	0.559658	0.214972
RXRA	Abca1	-0.0271326	0.309615	-0.317415	-0.133733	-0.103041	0.407589	-0.324852	-0.230625
RXRA	Abcb11	-0.31443	0.376548	0.0537312	0.366185	-0.292948	0.155305	-0.0731268	0.179213
RXRA	Abcc3	1.75229	2.97434	3.39686	1.6032	1.65656	1.46309	1.81934	0.998568
RXRA	Cpt1B	0.290954	4.69328	-0.0319659	0.994745	-0.307689	2.30022	0.0664217	-0.408901
RXRA	Cxcr5	0.0130424	-0.0816145	-0.0556579	0.0108143	-0.0686042	0.0429212	-0.0526327	0.00655754
RXRA	Cyp7A1	-0.253021	-0.157426	-0.746294	-2.18914	1.0599	0.375985	1.03275	0.901042
RXRA	Hnf1A	-0.0861877	0.0624145	-0.155433	-0.151625	-0.174635	-0.186887	0.0623662	0.0346698
RXRA	Hnf4A	0.0647945	-0.21793	-0.11182	-0.106202	0.0486229	-0.476356	0.0344495	0.0177751
RXRA	Il2Ra	0.035615	-0.00591467	0.0192823	0.011932	-0.0827434	-0.0476249	-0.0758794	0.0207964
RXRA	Il2Rb	0.0854109	-0.361673	-0.149087	-0.135275	0.0270465	-0.305924	-0.0589019	-0.234975
RXRA	Il2Rg	-0.0746376	-0.185305	0.26643	-0.0193752	-0.251097	-0.090649	0.127032	-0.365657
RXRA	Nol7	0.0509114	0.498454	0.284282	0.294284	0.0362551	0.237208	0.0302764	0.146115
RXRA	Pld1	-0.0828724	-0.329215	-0.245138	-0.0512033	0.00179069	-0.138914	-0.0391794	0.0316294
RXRA	Serpinc1	0.068838	-0.0972735	-0.0703996	-0.236958	-0.0254101	-0.232435	-0.00236745	-0.0619377
RXRA	Thbd	-0.187595	-0.0258207	0.0484212	-0.153749	0.118769	-0.121532	0.559658	0.214972
SREBF1	Acacb	-0.043037	1.49695	0.22225	0.426618	-0.00374387	1.27553	0.470722	0.190347
SREBF1	Acly	-0.0271307	0.380692	-0.146851	-0.573244	0.359715	1.82155	0.514127	0.215714
SREBF1	Apoa5	-0.191211	-1.46262	-0.561874	-1.12372	-0.222997	-0.938344	-0.317633	-0.455439
SREBF1	Ar	-0.353785	-0.416822	0.0148295	-0.0987367	0.138082	-0.266042	0.0261821	0.0887933
SREBF1	Bcl2L1	-0.165172	-0.176166	-0.0512535	-0.140142	-0.0465519	-0.125897	0.0965972	-0.0612968
SREBF1	Cav1	-0.0923444	0.266163	0.465203	-0.324612	0.226562	-0.0359248	0.662988	0.392391
SREBF1	Cic	-0.0075751	-0.329125	-0.249145	-0.0939368	-0.0663492	0.0049214	-0.135886	-0.0251835
SREBF1	Fabp6	-0.0243396	-0.34026	-0.0831617	-0.208379	-0.104447	-0.519707	-0.00689551	-0.300703
SREBF1	Fas	-0.0979813	0.133452	0.225527	-0.0713434	-0.123408	-0.146258	-0.495634	0.0637123
SREBF1	Fasn	-0.477807	0.877341	0.0112291	-0.393321	0.0627295	2.13377	0.5468	0.150471
SREBF1	Fdft1	0.0769225	-0.320018	0.179245	-0.107732	0.261679	0.0915866	0.465631	-0.160788
SREBF1	Fdps	-0.0411226	0.406355	-0.0440927	-0.0900983	0.413432	0.612668	0.459915	-4.3e-05
SREBF1	Hk2	-0.0515802	-0.251911	0.030065	-0.116076	-0.143264	-0.170113	0.0841852	-0.0386393
SREBF1	Hmox1	0.470527	-0.392379	0.726385	-0.59694	0.313817	0.330113	0.662878	-0.0623611
SREBF1	Irs2	-0.325908	-0.218387	0.10909	-0.084875	-0.265755	-0.0597547	0.0422176	-0.186654
SREBF1	Ldlr	0.427422	0.537758	-0.0195348	0	-0.176823	0.283312	0.31342	0.0222241
SREBF1	Lpin1	-1.07685	-0.630869	-1.26535	-0.952864	-0.374231	0.426342	-0.30566	-0.205328
SREBF1	Lrp1	-0.124959	0.176059	-0.210037	0.211512	-0.289955	-0.03138	-0.0333942	0.0583769
SREBF1	Nr0B2	-0.576272	0.44345	0.00615489	-0.53273	0.0594443	1.30455	0.60244	0.725558
SREBF1	Pck1	-2.25302	-3.61648	-1.07312	-2.83298	0.403392	-1.29044	1.09258	-0.631123
SREBF1	Pcsk9	0.120487	-0.448861	-0.462812	-0.697727	0.356172	0.078547	0.0317753	-0.287728
SREBF1	Pdx1	0.0868485	-0.00963019	-0.0924191	0.134401	-0.0446328	0.201136	-0.161443	0.0352185
SREBF1	Pparg	-0.0280049	-0.00495616	0.523492	0.177374	0.109833	0.0358285	0.236607	0.233945
SREBF1	Scd	-1.38066	3.56803	0.22782	1.16145	-0.794286	3.64081	0.644312	0.865888
SREBF1	Thrsp	-0.240847	0.954287	0.0029438	-1.50914	0.481101	2.09929	0.460195	0.250405

## Sheet: MIE-Targets-TRRUST
Source	Target
AHR	ABCG2				MIEs	No. of targets
AHR	AHRR				AHR	22
AHR	ARNT				AR	93
AHR	BRCA1				ESR1	76
AHR	CA9				ESR2	19
AHR	CCND1				HNF4A	45
AHR	CCNG2				NFE2	4
AHR	CYP1A1				NR1H2	3
AHR	CYP1A2				NR1H3	5
AHR	CYP1B1				NR1H4	20
AHR	CYP2B6				NR1I2	26
AHR	FOS				NR1I3	3
AHR	IL13				NR3C1	38
AHR	IL1B				PPARA	39
AHR	IL6				PPARG	66
AHR	MFSD2A				RARA	26
AHR	MT2A				RARB	3
AHR	MYC				RARG	5
AHR	PCNA				RXRA	20
AHR	RFC3				SREBF1	27
AHR	UGT1A1
AHR	UGT1A6				Total	540
AR	ACTA1
AR	AKR1C3
AR	AKT1
AR	ALDH1A3
AR	ARG1
AR	ARG2
AR	ATAD2
AR	BSG
AR	BTG1
AR	BTG2
AR	CDK20
AR	CDC6
AR	CDH1
AR	CDH11
AR	CDH2
AR	CDK6
AR	CDKN1A
AR	CLK3
AR	CRH
AR	CRISP1
AR	CRISP3
AR	CTNNB1
AR	CYP7B1
AR	EGFR
AR	ELK4
AR	EP300
AR	ERBB2
AR	ERBB3
AR	ETV1
AR	FKBP4
AR	FN1
AR	FOLH1
AR	FOXA1
AR	GNMT
AR	GREB1
AR	GTF2F1
AR	HMMR
AR	HMOX1
AR	IFI16
AR	IGF1R
AR	IGFBP3
AR	JUN
AR	KISS1
AR	KISS1R
AR	KLF5
AR	KLK1
AR	KLK2
AR	KLK3
AR	KLK4
AR	MED1
AR	MID1
AR	MUC1
AR	MYC
AR	NAT1
AR	NDRG1
AR	NFKB1
AR	NKX3-1
AR	NOV
AR	NRAS
AR	PC
AR	PSCA
AR	PEBP1
AR	PIGR
AR	PIP
AR	PMEPA1
AR	PNRC1
AR	PTEN
AR	PTGS2
AR	PTPN1
AR	RELA
AR	REST
AR	2024-09-07
AR	SERPINB5
AR	SESN1
AR	SRD5A3
AR	STIM1
AR	TBP
AR	TCF7L2
AR	TGFA
AR	TH
AR	TJP1
AR	TMPRSS2
AR	TRPS1
AR	TSC1
AR	TSC2
AR	UCN
AR	UGT2B15
AR	USP26
AR	VEGFA
AR	VIM
AR	WEE1
AR	WNT7B
AR	XIAP
ESR1	ABCG2
ESR1	AHR
ESR1	AMH
ESR1	AR
ESR1	AVP
ESR1	BCL2
ESR1	BLM
ESR1	BRCA1
ESR1	BTG2
ESR1	CCNA2
ESR1	CCND1
ESR1	CD24
ESR1	CDH1
ESR1	CDK4
ESR1	CDKN1A
ESR1	CDKN1B
ESR1	CEBPB
ESR1	CHAT
ESR1	CRH
ESR1	CRHBP
ESR1	CTNNB1
ESR1	CTSD
ESR1	CXCL12
ESR1	CYP19A1
ESR1	CYP1A1
ESR1	CYP1B1
ESR1	CYP2C19
ESR1	DCT
ESR1	E2F1
ESR1	EGFR
ESR1	ESR1
ESR1	ESRRA
ESR1	F12
ESR1	FLT1
ESR1	FOS
ESR1	FOXP1
ESR1	GREB1
ESR1	HSPB1
ESR1	HTRA2
ESR1	JAK2
ESR1	JUN
ESR1	JUNB
ESR1	KDR
ESR1	KRT19
ESR1	MDM2
ESR1	MICB
ESR1	MMP13
ESR1	MTA3
ESR1	MYC
ESR1	NQO1
ESR1	NR5A2
ESR1	NRF1
ESR1	OXT
ESR1	PELP1
ESR1	PGR
ESR1	PLAC1
ESR1	PMAIP1
ESR1	PTMA
ESR1	RARA
ESR1	RET
ESR1	RUNX2
ESR1	SERPINB9
ESR1	SERPINE1
ESR1	SP1
ESR1	TAC3
ESR1	TERT
ESR1	TFF1
ESR1	TGFA
ESR1	TP53
ESR1	TYMS
ESR1	UGT1A4
ESR1	UGT2B15
ESR1	VEGFA
ESR1	YWHAQ
ESR1	ZEB1
ESR1	ZFHX3
ESR2	AVP
ESR2	BRCA2
ESR2	CD68
ESR2	CDKN1A
ESR2	CHAT
ESR2	CRH
ESR2	CTSD
ESR2	FOS
ESR2	INSR
ESR2	JUN
ESR2	MKNK2
ESR2	OXT
ESR2	PELP1
ESR2	PTPRC
ESR2	SERPINE1
ESR2	TERT
ESR2	TFF1
ESR2	TGFA
ESR2	VEGFA
HNF4A	ABCC6
HNF4A	ABCG5
HNF4A	ABCG8
HNF4A	ACAT2
HNF4A	AFP
HNF4A	AKR1C4
HNF4A	APOA1
HNF4A	APOA2
HNF4A	APOB
HNF4A	APOC3
HNF4A	C1QTNF5
HNF4A	CDKN1A
HNF4A	CEACAM1
HNF4A	CYP27A1
HNF4A	CYP2B6
HNF4A	CYP2C8
HNF4A	CYP2C9
HNF4A	CYP2D6
HNF4A	CYP3A4
HNF4A	CYP7A1
HNF4A	FABP2
HNF4A	GCK
HNF4A	GFER
HNF4A	GH1
HNF4A	GPR39
HNF4A	HNF1A
HNF4A	KCNJ11
HNF4A	LDLR
HNF4A	LIPC
HNF4A	MMP7
HNF4A	MTTP
HNF4A	MYC
HNF4A	NPC1L1
HNF4A	NR1I2
HNF4A	PCSK9
HNF4A	PPARA
HNF4A	RNASE2
HNF4A	SERPINC1
HNF4A	SHBG
HNF4A	SLC22A6
HNF4A	SLC26A3
HNF4A	TBP
HNF4A	TCF7L2
HNF4A	UGT1A7
HNF4A	UGT2B7
NFE2	GCLC
NFE2	GSS
NFE2	HBE1
NFE2	TBXA2R
NR1H2	ABCA1
NR1H2	ABCG1
NR1H2	ABCG4
NR1H3	ABCA1
NR1H3	ABCG1
NR1H3	ABCG4
NR1H3	BHLHE40
NR1H3	CETP
NR1H4	ABCB11
NR1H4	ABCB4
NR1H4	ABCC4
NR1H4	CYP7A1
NR1H4	DCN
NR1H4	EDN1
NR1H4	FABP6
NR1H4	HSD3B2
NR1H4	INS
NR1H4	KLF11
NR1H4	KRT13
NR1H4	NFKB1
NR1H4	NR1I2
NR1H4	PLTP
NR1H4	RELA
NR1H4	SCARB1
NR1H4	SLCO1B3
NR1H4	STK11
NR1H4	UGT2B4
NR1H4	VEGFA
NR1I2	ABCB1
NR1I2	BCL2
NR1I2	BCL2L1
NR1I2	CCL2
NR1I2	CORO1C
NR1I2	CYP2B6
NR1I2	CYP2C8
NR1I2	CYP2C9
NR1I2	CYP3A4
NR1I2	CYP4F12
NR1I2	FGF19
NR1I2	FOSL1
NR1I2	HP
NR1I2	IL10
NR1I2	KLF6
NR1I2	NFKB1
NR1I2	NOD1
NR1I2	NOD2
NR1I2	PTAFR
NR1I2	RAB3A
NR1I2	RELA
NR1I2	RXRA
NR1I2	THBS1
NR1I2	THRSP
NR1I2	TNFRSF12A
NR1I2	UGT1A1
NR1I3	CYP2B6
NR1I3	CYP2C9
NR1I3	UGT1A1
NR3C1	ATF2
NR3C1	ATP1B1
NR3C1	BAD
NR3C1	BAX
NR3C1	BGLAP
NR3C1	BRCA1
NR3C1	CALD1
NR3C1	CCND1
NR3C1	CCND3
NR3C1	CDK4
NR3C1	CDK6
NR3C1	CDKN1A
NR3C1	COX1
NR3C1	CSF1R
NR3C1	CYP19A1
NR3C1	ELK1
NR3C1	ETS1
NR3C1	HRH1
NR3C1	HSD11B2
NR3C1	MAOA
NR3C1	MUC4
NR3C1	NFKB1
NR3C1	NR1I2
NR3C1	NR3C1
NR3C1	PNRC1
NR3C1	PPIG
NR3C1	RLN1
NR3C1	RLN2
NR3C1	RPS6KA3
NR3C1	S100P
NR3C1	SCNN1A
NR3C1	SLC10A2
NR3C1	SPP1
NR3C1	SRF
NR3C1	STAT1
NR3C1	TAT
NR3C1	TP53
NR3C1	UGT1A1
PPARA	ACADL
PPARA	ACOX1
PPARA	ACSL1
PPARA	ANGPTL4
PPARA	APOA4
PPARA	APOA5
PPARA	APOB
PPARA	APOBR
PPARA	APOC3
PPARA	CD36
PPARA	CETP
PPARA	CGB5
PPARA	CPT1A
PPARA	CYP1A1
PPARA	CYP2C9
PPARA	FABP4
PPARA	G0S2
PPARA	HMOX1
PPARA	IGFBP1
PPARA	IL6
PPARA	IL6R
PPARA	LPL
PPARA	MLYCD
PPARA	MMP9
PPARA	NFKBIA
PPARA	PDK4
PPARA	PLIN2
PPARA	PTGS2
PPARA	SERPINE1
PPARA	SLC25A20
PPARA	SLC9A1
PPARA	SOD2
PPARA	SREBF2
PPARA	STAT5A
PPARA	SULT2A1
PPARA	TUBA1B
PPARA	TXNIP
PPARA	UCP1
PPARA	UGT1A9
PPARG	ABCG2
PPARG	ACAT1
PPARG	ADIPOQ
PPARG	AGER
PPARG	ANGPTL4
PPARG	APOB
PPARG	APOBR
PPARG	ATP2A2
PPARG	BAD
PPARG	BCL2
PPARG	BCL2L1
PPARG	BRS3
PPARG	CAT
PPARG	CAV1
PPARG	CCND1
PPARG	CCNE1
PPARG	CD36
PPARG	CD83
PPARG	CDKN1A
PPARG	CEBPA
PPARG	CFLAR
PPARG	CIITA
PPARG	CLDN2
PPARG	CPT1B
PPARG	CSF1
PPARG	DBI
PPARG	DEFB103A
PPARG	EGFR
PPARG	ERO1A
PPARG	ERP44
PPARG	FABP4
PPARG	FASLG
PPARG	FGF1
PPARG	GDF15
PPARG	GK
PPARG	HMOX1
PPARG	ICAM1
PPARG	JAG1
PPARG	KLF4
PPARG	LIPE
PPARG	MMP1
PPARG	MMP9
PPARG	MYC
PPARG	NOTCH4
PPARG	NR1H3
PPARG	PDK2
PPARG	PLIN2
PPARG	POU2F1
PPARG	PTEN
PPARG	PTGS2
PPARG	RARB
PPARG	REN
PPARG	RETN
PPARG	SAT1
PPARG	SERPINE1
PPARG	SLC2A4
PPARG	SLC5A5
PPARG	SLC9A1
PPARG	SOCS7
PPARG	TG
PPARG	TNFRSF11B
PPARG	TP53
PPARG	TSHR
PPARG	TXNIP
PPARG	UGT1A9
PPARG	VLDLR
RARA	ABCC3
RARA	ANXA8
RARA	CCNA1
RARA	CDKN1A
RARA	CRABP1
RARA	CRH
RARA	CXCR5
RARA	CYP1A1
RARA	ETS1
RARA	FGFBP1
RARA	GNRH2
RARA	HCK
RARA	HNF4A
RARA	HSD17B2
RARA	ICAM1
RARA	MACROD1
RARA	MAOB
RARA	MUC5AC
RARA	NR1I3
RARA	PLAU
RARA	PRKCA
RARA	RARB
RARA	RPTOR
RARA	SCD
RARA	SFTPB
RARA	THBD
RARB	ADH5
RARB	RARB
RARB	THBD
RARG	BGLAP
RARG	CYP19A1
RARG	ICAM1
RARG	RARB
RARG	THBD
RXRA	ABCA1
RXRA	ABCB11
RXRA	ABCC3
RXRA	CGB5
RXRA	CPT1B
RXRA	CXCR5
RXRA	CYP3A4
RXRA	CYP7A1
RXRA	GNRH2
RXRA	HNF1A
RXRA	HNF4A
RXRA	HSD17B2
RXRA	IL2RA
RXRA	IL2RB
RXRA	IL2RG
RXRA	NOL7
RXRA	PLD1
RXRA	SERPINC1
RXRA	THBD
RXRA	TLR10
SREBF1	ACACB
SREBF1	ACLY
SREBF1	APOA5
SREBF1	AR
SREBF1	BCL2L1
SREBF1	CAV1
SREBF1	CETP
SREBF1	CIC
SREBF1	FABP6
SREBF1	FAS
SREBF1	FASN
SREBF1	FDFT1
SREBF1	FDPS
SREBF1	HK2
SREBF1	HMOX1
SREBF1	IRS2
SREBF1	LDLR
SREBF1	LPIN1
SREBF1	LRP1
SREBF1	NR0B2
SREBF1	PCK1
SREBF1	PCSK9
SREBF1	PDX1
SREBF1	PPARG
SREBF1	SCD
SREBF1	SCD5
SREBF1	THRSP

## Sheet: Fatty liver-AOPs
AOP-DB | US EPA							https://aopdb.epa.gov/
	AOP ID	Name	AOPWiki
	6	Antagonist binding to PPARα leading to body-weight loss	AOPWiki
	7	Aromatase (Cyp19a1) reduction leading to impaired fertility in adult female	AOPWiki
	8	Upregulation of Thyroid Hormone Catabolism via Activation of Hepatic Nuclear Receptors, and Subsequent Adverse Neurodevelopmental Outcomes in Mammals	AOPWiki
	11	Percellome Toxicogenomics Approach for AOP Building: Case study on Pentachlorophenol	AOPWiki
	12	Chronic binding of antagonist to N-methyl-D-aspartate receptors (NMDARs) during brain development leads to neurodegeneration with impairment in learning and memory in aging	AOPWiki
	13	Chronic binding of antagonist to N-methyl-D-aspartate receptors (NMDARs) during brain development induces impairment of learning and memory abilities	AOPWiki
	18	PPARα activation in utero leading to impaired fertility in males	AOPWiki
	19	Androgen receptor antagonism leading to adverse effects in the male foetus (mammals)	AOPWiki
	21	Aryl hydrocarbon receptor activation leading to early life stage mortality, via increased COX-2	AOPWiki
	23	Androgen receptor agonism leading to reproductive dysfunction (in repeat-spawning fish)	AOPWiki
	25	Aromatase inhibition leading to reproductive dysfunction	AOPWiki
	27	Cholestatic Liver Injury induced by Inhibition of the Bile Salt Export Pump (ABCB11)	AOPWiki
	28	Cyclooxygenase inhibition leading reproductive failure	AOPWiki
	34	LXR activation leading to hepatic steatosis	AOPWiki
	36	Peroxisomal Fatty Acid Beta-Oxidation Inhibition Leading to Steatosis	AOPWiki
	37	PPARα activation leading to hepatocellular adenomas and carcinomas in rodents	AOPWiki
	41	Sustained AhR Activation leading to Rodent Liver Tumours	AOPWiki
	43	Disruption of VEGFR Signaling Leading to Developmental Defects	AOPWiki
	46	AFB1: Mutagenic Mode-of-Action leading to Hepatocellular Carcinoma (HCC)	AOPWiki
	51	PPARα activation leading to impaired fertility in adult male rodents	AOPWiki
	54	Inhibition of Na+/I- symporter (NIS) leads to learning and memory impairment	AOPWiki
	57	AhR activation leading to hepatic steatosis	AOPWiki
	58	NR1I3 (CAR) suppression leading to hepatic steatosis	AOPWiki
	59	HNF4alpha suppression leading to hepatic steatosis	AOPWiki
	60	NR1I2 (Pregnane X Receptor, PXR) activation leading to hepatic steatosis	AOPWiki
	61	NFE2L2/FXR activation leading to hepatic steatosis	AOPWiki
	62	AKT2 activation leading to hepatic steatosis	AOPWiki
	63	Cyclooxygenase inhibition leading to reproductive dysfunction	AOPWiki
	72	Epigenetic modification of PPARG leading to adipogenesis	AOPWiki
	100	Cyclooxygenase inhibition leading to reproductive dysfunction via inhibition of female spawning behavior	AOPWiki
	101	Cyclooxygenase inhibition leading to reproductive dysfunction via inhibition of pheromone release	AOPWiki
	102	Cyclooxygenase inhibition leading to reproductive dysfunction via interference with meiotic prophase I /metaphase I transition	AOPWiki
	103	Cyclooxygenase inhibition leading to reproductive dysfunction via interference with spindle assembly checkpoint	AOPWiki
	111	Decrease in androgen receptor activity leading to Leydig cell tumors (in rat)	AOPWiki
	117	Androgen receptor activation leading to hepatocellular adenomas and carcinomas (in mouse and rat)	AOPWiki
	122	Prolyl hydroxylase inhibition leading to reproductive dysfunction via increased HIF1 heterodimer formation	AOPWiki
	123	Unknown MIE leading to reproductive dysfunction via increased HIF-1alpha transcription	AOPWiki
	131	Aryl hydrocarbon receptor activation leading to uroporphyria	AOPWiki
	148	EGFR Activation Leading to Decreased Lung Function	AOPWiki
	150	Aryl hydrocarbon receptor activation leading to early life stage mortality, via reduced VEGF	AOPWiki
	153	Aromatase Inhibition leading to Ovulation Inhibition and Decreased Fertility in Female Rats	AOPWiki
	154	Inhibition of Calcineurin Activity Leading to Impaired T-Cell Dependent Antibody Response	AOPWiki
	163	PPARgamma activation leading to sarcomas in rats, mice, and hamsters	AOPWiki
	164	Beta-2 adrenergic agonist activity leading to mesovarian leiomyomas in the rat and mouse	AOPWiki
	166	PPARalpha activation leading to pancreatic acinar tumors in the rat and mouse	AOPWiki
	187	Anticoagulant rodenticide inhibition of vitamin K epoxide reductase resulting coagulopathy and hemorrhage	AOPWiki
	196	Volatile Organic Chemicals Activate TRPA1 Receptor to Induce Sensory Pulmonary Irritation	AOPWiki
	200	Estrogen receptor activation leading to breast cancer	AOPWiki
	220	Cyp2E1 Activation Leading to Liver Cancer	AOPWiki
	307	Decreased testosterone synthesis leading to short anogenital distance (AGD) in male (mammalian) offspring	AOPWiki
	310	Embryonic Activation of the AHR leading to Reproductive failure, via epigenetic down-regulation of GnRHR	AOPWiki
	318	Glucocorticoid Receptor activation leading to hepatic steatosis	AOPWiki

## Sheet: Steatosis-AOPs
AOP-DB | US EPA											https://aopdb.epa.gov/
	AOP ID	Name	AOPWiki
	34	LXR activation leading to hepatic steatosis	AOPWiki
	36	Peroxisomal Fatty Acid Beta-Oxidation Inhibition Leading to Steatosis	AOPWiki
	57	AhR activation leading to hepatic steatosis	AOPWiki
	58	NR1I3 (CAR) suppression leading to hepatic steatosis	AOPWiki
	59	HNF4alpha suppression leading to hepatic steatosis	AOPWiki
	60	NR1I2 (Pregnane X Receptor, PXR) activation leading to hepatic steatosis	AOPWiki
	61	NFE2L2/FXR activation leading to hepatic steatosis	AOPWiki
	62	AKT2 activation leading to hepatic steatosis	AOPWiki
	167	Early-life estrogen receptor activity leading to endometrial carcinoma in the mouse.	AOPWiki
	232	NFE2/Nrf2 repression to steatosis	AOPWiki
	318	Glucocorticoid Receptor activation leading to hepatic steatosis	AOPWiki

## Sheet: Fatty liver-MIEs
																			MIEs
Aop:100	Event:79	MolecularInitiatingEvent	Inhibition, Cyclooxygenase activity									https://aopdb.epa.gov/
Aop:101	Event:79	MolecularInitiatingEvent	Inhibition, Cyclooxygenase activity									https://aopwiki.org/
Aop:102	Event:79	MolecularInitiatingEvent	Inhibition, Cyclooxygenase activity
Aop:103	Event:79	MolecularInitiatingEvent	Inhibition, Cyclooxygenase activity
Aop:11	Event:245	MolecularInitiatingEvent	Activation, PXR/SXR																PXR/SXR
Aop:111	Event:742	MolecularInitiatingEvent	Decreased, Androgen receptor activity																AR
Aop:117	Event:785	MolecularInitiatingEvent	Activation, Androgen receptor																AR
Aop:12	Event:201	MolecularInitiatingEvent	Binding of antagonist, NMDA receptors
Aop:122	Event:798	MolecularInitiatingEvent	Inhibition, Prolyl hydroxylases
Aop:123	Event:801	MolecularInitiatingEvent	modulation, Unknown
Aop:13	Event:201	MolecularInitiatingEvent	Binding of antagonist, NMDA receptors
Aop:131	Event:18	MolecularInitiatingEvent	Activation, AhR																AHR
Aop:148	Event:941	MolecularInitiatingEvent	Activation, EGFR																EGFR
Aop:150	Event:18	MolecularInitiatingEvent	Activation, AhR																AHR
Aop:153	Event:964	MolecularInitiatingEvent	Inhibition of Aromatase Enzyme, Chemical exposure during critical window of estrous cycle between diestrus 2 and proestrus inhibits aromatase conversion of testosterone to estradiol
Aop:154	Event:980	MolecularInitiatingEvent	Inhibition, Calcineurin Activity
Aop:163	Event:1028	MolecularInitiatingEvent	Activation of specific nuclear receptors, PPAR-gamma activation																PPARG
Aop:164	Event:1038	MolecularInitiatingEvent	Activation, beta-2 adrenergic receptor
Aop:18	Event:227	MolecularInitiatingEvent	Activation, PPARÎ±																PPAR
Aop:187	Event:1134	MolecularInitiatingEvent	Irreversible inhibition of hepatic VKOR by binding of AR at tyrosine 139, Failure to cycle vitamin K epoxide to vitamin K to form vitamin K hydroquinone																VKOR
Aop:187	Event:1138	MolecularInitiatingEvent	Uncoupling of oxidative phosphorylation, Reduced ability to generate ATP
Aop:187	Event:1169	MolecularInitiatingEvent	Anticoagulant rodenticide interferes with carboxylation of Gla proteins in bone, Impairment of post-translational modification (carboxylation) of osteocalcin
Aop:19	Event:27	MolecularInitiatingEvent	N/A, Androgen receptor, Antagonism																AR
Aop:196	Event:1215	MolecularInitiatingEvent	TRPA1 activation, TRPA1 Receptor																TRPA1
Aop:200	Event:1181	MolecularInitiatingEvent	Activation, Estrogen receptor																ER
Aop:21	Event:18	MolecularInitiatingEvent	Activation, AhR																AHR
Aop:220	Event:1391	MolecularInitiatingEvent	Activation of Cyp2E1																CYP2E1
Aop:23	Event:25	MolecularInitiatingEvent	Agonism, Androgen receptor																AR
Aop:25	Event:36	MolecularInitiatingEvent	Inhibition, Aromatase
Aop:27	Event:41	MolecularInitiatingEvent	Inhibition, Bile Salt Export Pump (ABCB11)																ABCB11
Aop:28	Event:79	MolecularInitiatingEvent	Inhibition, Cyclooxygenase activity
Aop:310	Event:18	MolecularInitiatingEvent	Activation, AhR																AHR
Aop:318	Event:122	MolecularInitiatingEvent	Activation, Glucocorticoid Receptor																GR
Aop:34	Event:167	MolecularInitiatingEvent	Activation, LXR																LXR
Aop:34	Event:228	MolecularInitiatingEvent	peroxisome proliferator activated receptor promoter demethylation																PPAR
Aop:36	Event:231	MolecularInitiatingEvent	Decreased, PPAR-alpha activation																PPARA
Aop:36	Event:232	MolecularInitiatingEvent	Decreased, PPAR-beta activation																PPARB
Aop:36	Event:233	MolecularInitiatingEvent	Decreased, PPAR-gamma activation																PPARG
Aop:37	Event:227	MolecularInitiatingEvent	Activation, PPARÎ±																PPAR
Aop:41	Event:165	MolecularInitiatingEvent	Activation, Long term AHR receptor driven direct and indirect gene expression changes																AHR
Aop:43	Event:305	MolecularInitiatingEvent	Inhibition, VegfR2																VEGFR2
Aop:46	Event:373	MolecularInitiatingEvent	Formation, Pro-mutagenic DNA Adducts
Aop:51	Event:227	MolecularInitiatingEvent	Activation, PPARÎ±																PPAR
Aop:54	Event:424	MolecularInitiatingEvent	Inhibition, Na+/I- symporter (NIS)																NIS
Aop:57	Event:18	MolecularInitiatingEvent	Activation, AhR																AHR
Aop:58	Event:456	MolecularInitiatingEvent	Suppression, Constitutive androstane receptor, NR1l3																NR1I3
Aop:58	Event:468	MolecularInitiatingEvent	Inhibition, PPAR alpha																PPARA
Aop:58	Event:167	MolecularInitiatingEvent	Activation, LXR																LXR
Aop:58	Event:228	MolecularInitiatingEvent	peroxisome proliferator activated receptor promoter demethylation																HNF4A
Aop:59	Event:461	MolecularInitiatingEvent	Suppression, HNF4alpha																PPARA
Aop:6	Event:998	MolecularInitiatingEvent	Binding of antagonist, PPAR alpha																PXR/SXR
Aop:60	Event:245	MolecularInitiatingEvent	Activation, PXR/SXR																NRF2
Aop:61	Event:478	MolecularInitiatingEvent	Activation, NRF2																NR1H2
Aop:61	Event:479	MolecularInitiatingEvent	Activation, NR1H4
Aop:62	Event:486	MolecularInitiatingEvent	systemic inflammation leading to hepatic steatosis
Aop:63	Event:79	MolecularInitiatingEvent	Inhibition, Cyclooxygenase activity																CYP19A1
Aop:7	Event:408	MolecularInitiatingEvent	reduction in ovarian granulosa cells, Aromatase (Cyp19a1)																PPAR
Aop:72	Event:228	MolecularInitiatingEvent	peroxisome proliferator activated receptor promoter demethylation
Aop:72	Event:1454	MolecularInitiatingEvent	chronic high fat diet
Aop:8	Event:239	MolecularInitiatingEvent	Activation, Pregnane-X receptor, NR1l2																NR1I2

## Sheet: Steatosis-MIEs
											MIEs
Aop:167	Event:1064	MolecularInitiatingEvent	prepubertal increase, Estrogen receptor (ER) activity								ER			https://aopdb.epa.gov/
Aop:232	Event:1417	MolecularInitiatingEvent	NFE2/Nrf2 repression								NFE2/NRF2			https://aopwiki.org/
Aop:318	Event:122	MolecularInitiatingEvent	Activation, Glucocorticoid Receptor								GR
Aop:34	Event:167	MolecularInitiatingEvent	Activation, LXR								LXR
Aop:34	Event:228	MolecularInitiatingEvent	peroxisome proliferator activated receptor promoter demethylation								PPAR
Aop:36	Event:231	MolecularInitiatingEvent	Decreased, PPAR-alpha activation								PPARA
Aop:36	Event:232	MolecularInitiatingEvent	Decreased, PPAR-beta activation								PPARB
Aop:36	Event:233	MolecularInitiatingEvent	Decreased, PPAR-gamma activation								PPARG
Aop:57	Event:18	MolecularInitiatingEvent	Activation, AhR								AHR
Aop:58	Event:456	MolecularInitiatingEvent	Suppression, Constitutive androstane receptor, NR1l3								NR1I3
Aop:58	Event:468	MolecularInitiatingEvent	Inhibition, PPAR alpha								PPARA
Aop:58	Event:167	MolecularInitiatingEvent	Activation, LXR								LXR
Aop:58	Event:228	MolecularInitiatingEvent	peroxisome proliferator activated receptor promoter demethylation								PPAR
Aop:59	Event:461	MolecularInitiatingEvent	Suppression, HNF4alpha								HNF4A
Aop:60	Event:245	MolecularInitiatingEvent	Activation, PXR/SXR								PXR/SXR
Aop:61	Event:478	MolecularInitiatingEvent	Activation, NRF2								NRF2
Aop:61	Event:479	MolecularInitiatingEvent	Activation, NR1H4								NR1H4
Aop:62	Event:486	MolecularInitiatingEvent	systemic inflammation leading to hepatic steatosis
